1 **The Manifold Actions of Signaling Peptides on Subcellular Dynamics of a Receptor**  
2 **Specify Stomatal Cell Fate**

3

4

5 Xingyun Qi<sup>1\*</sup>, Michal Maes<sup>1+</sup>, Scott M. Zeng<sup>2</sup>, and Keiko U. Torii<sup>1,2,3</sup>

6 <sup>1</sup> Howard Hughes Medical Institute and Department of Biology, University of Washington, Seattle,

7 WA 98195, USA

8 <sup>2</sup> Department of Physics, University of Washington, Seattle, WA 98195, USA

9 <sup>3</sup> Howard Hughes Medical Institute and Department of Molecular Biosciences, University of Texas

10 at Austin, Austin, TX 78712, USA

11

12

13

14 Correspondence: [ktorii@utexas.edu](mailto:ktorii@utexas.edu)

15

16 \*Present address: Department of Biology, Rutgers University, Camden, NJ 08102, USA

17 +Present address: Institute of Systems Biology, Seattle, WA 98103, USA

18

19

20 **Summary**

21

22 Receptor endocytosis is important for signal activation and transduction. However, how a receptor  
23 interprets conflicting signals to adjust cellular output is not clearly understood. During plant  
24 development, the family of EPIDERMAL PATTERNING FACTOR (EPF) peptides fine-tunes  
25 stomatal patterning through ERECTA-family receptor kinases. Using genetic, cell biological, and  
26 pharmacological approaches, we report here that ERECTA-LIKE1 (ERL1), the major receptor  
27 restricting stomatal differentiation, undergoes dynamic subcellular behaviors in response to  
28 different signal inputs. ERL1 is constitutively recycled, whereas its activation by EPF1 peptide  
29 induces rapid internalization to multivesicular bodies (MVB). In contrast, dominant-negative ERL1  
30 resides predominantly in plasma membrane. The co-receptor, TOO MANY MOUTHS (TMM), is  
31 essential for EPF1-induced ERL1 internalization but dispensable for EPFL6-induced ERL1  
32 internalization. The peptide antagonist of EPF1, Stomagen/EPFL9, triggers retention of ERL1 in  
33 the endoplasmic reticulum. Our study elucidates that multiple related yet unique peptides specify  
34 cell fate by deploying the differential subcellular dynamics of a single receptor.

35

36

37

## 38 Introduction

39

40 Receptor-mediated endocytosis is an integral part of cellular signaling, as it mediates signal  
41 attenuation and provides spatial and temporal dimensions to signaling events. In mammalian  
42 systems, endocytosis of receptor tyrosine kinases can attenuate the signal outputs, by removing  
43 the active receptor pools from the plasma membrane, or it can specify signals at defined sites of  
44 action, such as signaling through endosomes (Sigismund et al., 2012). As a sessile organism,  
45 plants make use of a large number of receptor-like kinases (RLKs) for cell-cell, shoot-to-root, and  
46 inter-kingdom communications (Shiu and Bleecker, 2001). The RLKs with extracellular leucine-  
47 rich repeat domain, known as LRR-RLKs, comprise the largest RLK subfamily (Shiu and Bleecker,  
48 2001), and they specify critical aspects of development, environmental response, and immunity  
49 by perceiving extrinsic signals (Torii, 2004; Macho and Zipfel, 2014). Increasing evidence shows  
50 that the subcellular localization and trafficking routes of LRR-RLKs regulate their function and  
51 activity (Ben Khaled et al., 2015). In Arabidopsis, bacterial flagellin peptide flg22 induces the  
52 heterodimer formation consisting of the LRR-RLKs FLAGELLIN SENSING2 (FLS2) and BRI1-  
53 ASSOCIATED RECEPTOR KINASE (BAK1)/SOMATIC EMBRYOGENESIS RECEPTOR LIKE  
54 KINASE 3 (Chinchilla et al., 2007). This triggers the endocytosis and degradation of the complex  
55 to generate transient cellular immune signaling but also to prevent continuous signaling to the  
56 same stimulus (Robatzek et al., 2006; Beck et al., 2012). The brassinosteroid (BR) receptor  
57 BRASSINOSTEROID INSENSITIVE1 (BRI1) forms a complex with BAK1 (Li et al., 2002; Nam  
58 and Li, 2002; Bücherl et al., 2013). BRI1 can undergo constitutive endocytosis independent of  
59 BRs, but BRs can elevate BRI1 and BAK1 interaction and reduce the number of available BRI1-  
60 BAK1 complexes on the plasma membrane (Geldner et al., 2007; Bücherl et al., 2013; Hutten et  
61 al., 2017). CLAVATA1 (CLV1), an LRR-RLK that controls stem cell homeostasis within the shoot  
62 meristem (Clark et al., 1997), is downregulated by ligand-dependent internalization upon  
63 perception of its ligand CLV3 to buffer the signal of CLV3 (Nimchuk et al., 2011). It remains a key

64 question as to where within the cell these LRR-RLKs transduce signals and how different  
65 activation states of LRR-RLKs influence their subcellular localization.

66         Developmental patterning of stomata, adjustable pores on the plant epidermis for gas-  
67 exchange and transpiration, relies on intricate cell-cell communication mediated by signaling  
68 peptides and their receptors (Lau and Bergmann, 2012; Pillitteri and Torii, 2012). In Arabidopsis,  
69 secreted peptides from the EPF family, and their shared receptor LRR-RLKs ERECTA, ERL1 and  
70 ERL2, mediate this process (Rychel et al., 2010). Amongst the plant LRR-RLKs, the ERECTA  
71 family offers a unique advantage to study how multiple signals are perceived to achieve cell fate  
72 and patterning. EPF2 and EPF1 negatively regulate stomatal development primarily through  
73 ERECTA and ERL1, respectively (Hara et al., 2007; Hara et al., 2009; Hunt and Gray, 2009). In  
74 contrast, EPF-LIKE9 (EPFL9), also known as Stomagen, promotes stomatal development by  
75 competing with EPF2 and, to some extent, with EPF1 for receptor binding (Sugano et al., 2010;  
76 Lee et al., 2015; Lin et al., 2017; Qi et al., 2017). Moreover, EPFL4/5/6, a subfamily only  
77 expressed in hypocotyls and stems, also act as ligands for the ERECTA family to inhibit stomatal  
78 formation when an LRR receptor protein, TMM, is missing (Abrash and Bergmann, 2010; Abrash  
79 et al., 2011). Although the final phenotypic outcomes of these different EPF signaling events are  
80 well characterized, the very early step of signal transmission by the receptors remain elusive.  
81 While internalization of ERL2 was documented briefly (Ho et al., 2016), it is unknown whether it  
82 has any implications in signal transduction or in which subcellular organelle ERL2 was localized.

83         Among the ERECTA family, ERL1 regulates guard cell differentiation in an autocrine  
84 manner in addition to enforcing stomatal spacing of neighboring cells in a paracrine manner (Lee  
85 et al., 2012; Qi et al., 2017). This dual function of ERL1 can be attributed to its cell-type specific  
86 expression patterns as well as its ability to perceive different EPF/EPFL peptide ligands (Shpak  
87 et al., 2005; Lin et al., 2017). It remains unknown, however, how ERL1 receptor dynamics  
88 translate into the eventual stomatal cell fate. Here, we combined genetic, pharmacological, and

89 live imaging approaches to explore the initial events that occurred at ERL1 upon perception of  
90 different EPF peptides. Our study shows that EPF1 and EPFL6, the ligands activating the  
91 inhibitory stomatal signaling, trigger ERL1 endocytosis into MVBs. TMM, which can form a  
92 receptor complex with ERL1, is required for the EPF1-induced ERL1 internalization and  
93 suppression of stomatal fate, but is superfluous for EPFL6-induced ERL1 internalization.  
94 Surprisingly, Stomagen interferes with the inhibitory regulation of stomatal differentiation by  
95 retaining ERL1 to the endoplasmic reticulum, similar to when endocytosis was pharmacologically  
96 blocked by Tyrphostin A23 (Tyr A23) (Santuari et al., 2011) and Endosidin 9-17 (ES9-17)  
97 (Dejonghe et al., 2019). Our study reveals a mechanism by which plant cells interpret multiple  
98 signals through the subcellular localization and trafficking route of a single receptor.

99

100

## 101 **Results**

102

### 103 **ERL1 is internalized through multivesicular bodies to vacuolar pathway in stomatal** 104 **meristemoids**

105 To understand how stomatal cell fate decisions are made at the level of receptor subcellular  
106 dynamics, we first examined the localization of ERL1 (Figure 1). As reported previously (Qi et al.,  
107 2017), a functional ERL1-YFP fusion protein driven by its endogenous promoter (ERL1<sub>pro</sub>::ERL1-  
108 YFP) in *erl1* seedlings marks the plasma membrane of stomatal-lineage cells, most notably  
109 differentiating meristemoids. In addition, we detected some highly mobile punctae highlighted by  
110 ERL1-YFP within the cells (Figure 1A, Video 1). To define the subcellular localization of ERL1-  
111 YFP, its co-localization analysis was performed with marker proteins Syp43-RFP for trans-Golgi  
112 network (TGN), RFP-Ara7 for MVB, and Syp22-RFP for vacuoles (occasionally MVB) (Figure 1A).  
113 ERL1-YFP extensively co-localizes and moves together with RFP-Ara7 (Figure 1A, B, Video 1),  
114 whereas only 25 % and 18 % of ERL1-YFP-positive punctae are also labelled by Syp43-RFP and

115 Syp22-RFP, respectively. Thus, ERL1-YFP predominantly resides on the MVB. This is further  
116 confirmed by a pharmacological approach using Wortmannin (Wm), a fungal drug that can cause  
117 fusion of MVBs by inhibiting phosphatidylinositol-3 (PI3) and phosphatidylinositol-4 (PI4) kinases  
118 (Foissner et al., 2016). The Wm application on Arabidopsis seedlings resulted in the formation of  
119 typical ring-like Wm bodies marked by both ERL1-YFP and RFP-Ara7 (Figure 1C). Taken together,  
120 these results indicate that, within the stomatal precursor cells, ERL1 undergoes endocytic  
121 trafficking from plasma membrane to MVB.

122

### 123 **TMM is required for the process of ERL1 endocytosis in true leaves**

124 Endocytosis is an essential process to regulate cell signaling by controlling the turnover of plasma  
125 membrane proteome. We wondered if ERL1 endocytosis is related to its biological signaling. A  
126 previous work has shown that ERL1 forms a heterodimer with TMM, a receptor protein, to create  
127 a pocket for the proper binding of its major ligand EPF1 (Lee et al., 2012; Lin et al., 2017). The  
128 absence of TMM results in clustered stomata (Figure 2A), indicating that TMM is required for  
129 EPF1-ERL1 signaling to enforce proper stomatal spacing (Hara et al., 2007; Lee et al., 2012). As  
130 a first step to test whether active ERL1 signaling is a prerequisite for its endocytosis, we monitored  
131 ERL1 dynamics in *tmm* background (Figure 2A). Interestingly, the number of cells with ERL1-  
132 YFP-positive endosomes is greatly reduced in *tmm* mutant (63% in WT (n=323 cells) vs. 30% in  
133 *tmm* (n=466 cells)).

134 Activated plant receptor kinases can either be recycled back to the plasma membrane or  
135 are destined for endocytic degradation via MVB for signaling termination. To address whether  
136 TMM is required for a specific pathway, we first treated Arabidopsis *ERL1pro::ERL1-YFP*  
137 seedlings in wild type (*erl1*) and *tmm* (*erl1 tmm*) background with a membrane-trafficking drug  
138 brefeldin A (BFA), a chemical inhibitor of GNOM, an ADP-ribosylation factor - guanine nucleotide  
139 exchange factor that mediates endosomal recycling (Geldner et al., 2003). When treated with  
140 BFA, ERL1-YFP-positive BFA bodies were detected in both wild type and *tmm* mutant

141 background with no significant difference (Figures 2A, C). Furthermore, BFA treatment in the  
142 presence of protein synthesis inhibitor cycloheximide (CHX) conferred ERL1-YFP-positive BFA  
143 body formation in both wild type and *tmm* mutant with no discernable difference (Figure S1). Thus,  
144 the results indicate that ERL1 proteins deriving from an endosomal recycling pathway, but not  
145 from a secretory pathway, contribute to BFA body formation and that TMM does not influence  
146 recycling of ERL1.

147 Next, the seedlings were treated with Wm. In sharp contrast to the BFA treatment, the Wm  
148 treatment conferred significant reduction of ERL1-YFP-marked Wm-bodies in *tmm* compared to  
149 that in wild type (Figure 2D and E, 30% in wild type vs. 12% in *tmm*,  $p = 0.031$ , Student's t-test).  
150 Combined, the results suggest that TMM is essential for the internalization of ERL1 to MVB, rather  
151 than the recycling of ERL1 to the plasma membrane. To rule out the possibility that the reduced  
152 ERL1 endocytosis in *tmm* is due to defects in the general endocytic degradation machinery, we  
153 examined the effects of *tmm* on general endocytosis using FM4-64, a styryl dye used to trace the  
154 endocytic pathways in Arabidopsis (Meckel et al., 2004)(Figure S1A). In wild type, 92.8% (n=20  
155 cells) of ERL1-YFP-labelled endosomes can be stained by FM4-64. In *tmm*, however, FM4-64  
156 still internalizes to multiple endosomes whereas ERL1-YFP fails to internalize in 70% of the cells  
157 examined (n=30 cells) (Figure S1A). We next examined the effects of *tmm* on the formation of  
158 MVBs. In the cells co-expressing RFP-Ara7 and ERL1-YFP, no significant difference was  
159 observed in the numbers of RFP-Ara7-marked endosomes and Wm bodies between wild type  
160 and *tmm* (3.68 endosomes/cell in wild type vs. 4.12 endosomes/cell in *tmm* and 2.45 Wm  
161 bodies/cell in wild type vs. 3.00 Wm bodies/cell in *tmm*). In contrast, the *tmm* mutation conferred  
162 substantial reduction in ERL1-YFP-marked endosomes and Wm bodies (2.27 endosomes/cell in  
163 wild type vs. 0.78 endosomes/cell in *tmm* and 1.84 Wm bodies/cell in wild type vs. 0.73 Wm  
164 bodies/cell in *tmm*), all of which colocalized with RFP-Ara7 (Figure S2B, C). Thus, TMM is  
165 specifically required for ERL1's endocytic sorting pathway to MVB, a hallmark for eventual  
166 receptor degradation in a vacuole (Geldner and Robatzek, 2008).

167 To further explore the role of TMM for the ERL1 receptor dynamics on plasma membrane,  
168 we performed fluorescence recovery after photobleaching (FRAP) assays on ERL1-YFP on the  
169 plasma membrane, and the half time of fluorescence recovery was calculated from modeling to  
170 exponential curves (Figure 2F and G). In wild type, the calculated mean half time of ERL1-YFP  
171 fluorescence recovery ( $t_{1/2}$ ) was  $23.55 \pm 5.55$  sec, whereas in *tmm* it was  $70.89 \pm 24.63$  sec  
172 (Figure 2G). The longer recovery time of ERL1-YFP in *tmm* could be explained by the slower  
173 removal of the photobleached receptor molecules from the plasma membrane due to decreased  
174 internalization. Combined, these results support a notion that, in the absence of TMM, un-  
175 activated ERL1 receptors are not readily targeted for endocytic pathway and, consequently,  
176 remain stable on the plasma membrane.

177

#### 178 **Dominant-negative ERL1 receptor is predominantly at the plasma membrane**

179 It has been shown that removal of the cytoplasmic kinase domain from ERECTA-family RLKs  
180 confers strong dominant-negative effects both in aboveground organ growth and in stomatal  
181 patterning (Shpak et al., 2003; Lee et al., 2012). The dominant-negative ERL1 $\Delta$ K can directly  
182 binds its ligand EPF1 through the extracellular LRR domain. However, it is unable to signal and,  
183 consequently, confers paired and clustered stomata, thereby phenocopying *epf1* mutant (Figure  
184 3A and B) (Lee et al., 2012). We examined the subcellular dynamics of the dominant-negative  
185 ERL receptor, ERL1 $\Delta$ K fused with CFP driven by its endogenous promoter (*ERL1pro::ERL1 $\Delta$ K-  
186 CFP*) (Figure 3C). Strong CFP signal is detected on the plasma membrane of stomatal precursor  
187 cells, but only very few mobile punctae can be seen within cells (Figure 3C). Similar to ERL1  
188 behavior in *tmm* mutant, the dominant-negative ERL1 is sensitive to BFA treatment (Figure 3D, F  
189 and G), with 86% cells possessing ERL1 $\Delta$ K-CFP-marked BFA bodies. This BFA sensitivity of  
190 ERL1 $\Delta$ K was also observed in the presence of CHX (Figure S1), indicating that they represent  
191 recycling populations. In contrast, ERL1 $\Delta$ K-CFP exhibits insensitivity to Wm treatment, with only  
192 18% cells showing Wm bodies highlighted by ERL1 $\Delta$ K-CFP (Figure 3D, F and G). Notably, the



193 reduced endocytosis of ERL1 $\Delta$ K-CFP is not due to defects in the general endocytosis process,  
194 as FM4-64 can still internalize in the ERL1 $\Delta$ K-CFP positive cells on the transgenic seedling  
195 epidermis, like it does in cells with the full-length ERL1 (Figure 3E). These results suggest that  
196 activation of ERL1 signaling is required for the receptor internalization.

197

### 198 **EPF1 triggers TMM-dependent ERL1 internalization**

199 Of the 11 EPF family members, EPF1 is the major ligand for ERL1 (Lee et al., 2012). EPF1  
200 signaling plays a negative role in stomatal development, and the induction of EPF1 peptide (iEPF1)  
201 confers arrested stomatal precursors (Figure 4A) (Hara et al., 2007; Lee et al., 2012; Qi et al.,  
202 2017). We therefore tested whether the ERL1 internalization is ligand dependent. For this purpose,  
203 we first examined ERL1-YFP dynamics in *epf1* mutants. As shown in Figure S3A, both plasma  
204 membrane and highly mobile endosomes are highlighted by ERL1-YFP in *epf1*. When treated  
205 with BFA or Wm, the percentages of cells with ERL1-YFP-marked BFA or Wm bodies are similar  
206 between wild type and *epf1* (Figure S3B-E), indicating the general trafficking of ERL1-YFP is not  
207 severely affected in the absence of EPF1.

208         Considering the high similarity among the 11 EPF members, it is possible that the  
209 functional redundancy of other EPFs alleviates the defect of ERL1 internalization in *epf1*. To  
210 overcome the genetic redundancy, we took advantage of the biologically-active mature EPF1  
211 (MEPF1) peptide (Figure 4) (Lee et al., 2012; Qi et al., 2017). Different concentrations of MEPF1  
212 were applied to the true leaf epidermis of 7-day-old seedlings expressing *ERL1pro::ERL1-YFP*.  
213 The number of ERL1-YFP-positive endosomes per cell increases as the peptide concentration  
214 increases (Pearson correlation,  $r=0.56$ ,  $p= 2.2 \times 10^{-16}$ ; Figure S3C, E), indicating that MEPF1  
215 peptide triggers the internalization of ERL1 in a dosage-dependent manner. In the *tmm*  
216 background, however, the number of ERL1-YFP-positive endosomes per cell remains low  
217 regardless of the MEPF1 dosage applied (Figure 4D, F). Thus, in the absence of TMM, ERL1-  
218 YFP endocytosis is insensitive to MEPF1 application, consistent with the genetic evidence that

219 the *tmm* mutation is epistatic to induced *EPF1* overexpression (*iEPF1*) (Figure 4B) (Hara et al.,  
220 2007; Lee et al., 2012). Taken together, we conclude that EPF1 peptide ligand perception triggers  
221 the internalization of ERL1 receptor in a TMM-dependent manner.

222

### 223 **EPFL6 triggers ERL1 internalization in the absence of TMM**

224 A previous structural analysis has shown that binding of EPF1 to the ERL1-TMM receptor  
225 complex does not lead to conformational change (Lin et al., 2017). To test if the pre-formed ERL1-  
226 TMM receptor complex is required for the internalization of ERL1, we took advantage of EPFL6,  
227 a peptide related to EPF1 with a distinct property (Figure 5) (Abrash and Bergmann, 2010; Abrash  
228 et al., 2011). EPFL6 is normally expressed in the internal tissues of hypocotyls and stems, but  
229 not in the stomatal-lineage cells. Unlike EPF1, ectopic EPFL6 is a potent inhibitor of stomatal  
230 development, even in the *tmm* mutant background (Figure 5A, B) (Abrash and Bergmann, 2010;  
231 Abrash et al., 2011; Uchida et al., 2012). Using a similar strategy as MEPF1, we purified  
232 biologically active, predicted mature EPFL6 (MEPFL6) peptide. Indeed, the inhibition of stomatal  
233 formation by MEPFL6 is more sensitive in *tmm* mutant than in wild type (Figure S4). In contrast  
234 to MEPF1, MEPFL6 application induced ERL1-YFP internalization in a dosage-dependent  
235 manner regardless of the presence or absence of TMM (Figure 5C-F). The results indicate that  
236 TMM is not required for EPFL6-triggered ERL1-YFP internalization. Rather, the ERL1-YFP  
237 endocytosis accurately reflects the activity of ERL1 signaling to inhibit stomatal development  
238 (Figure 5 and Figure S4), thereby supporting the notion that distinct EPF/EPFL peptide ligands  
239 activate a sub-population of ERL1 receptor complexes to internalize through a TMM-based  
240 discriminatory mechanism.

241

### 242 **An antagonistic EPFL peptide, Stomagen, elicits retention of ERL1-YFP in the endoplasmic** 243 **reticulum**

244 Stomagen promotes stomatal development by competing with other EPFs for binding to the same  
245 receptor complex, including ERL1 (Figure 6A) (Kondo et al., 2010; Sugano et al., 2010; Lee et al.,  
246 2015; Lin et al., 2017; Qi et al., 2017). Because the activated ERL1 receptor undergoes  
247 endocytosis to MVBs, we sought to address the role of Stomagen on subcellular dynamics of  
248 ERL1. For this purpose, we first applied bioactive Stomagen peptide on seedlings expressing  
249 *ERL1pro::ERL1-YFP* in *erl1*. Unlike in mock-treated samples, YFP signal was detected inside of  
250 the cells (Figure S5A). We subsequently treated Stomagen peptides to ERL1-YFP in the *erecta*  
251 *erl1 erl2* triple mutant background to remove any potential redundancy among three ERECTA-  
252 family receptors. Strikingly, strong ERL1-YFP signals were detected in a ring-like structure  
253 surrounding the nucleus (Figure 6B), which co-localizes with the endoplasmic reticulum marker  
254 protein RFP-KDEL (Figure 6B). Thus, Stomagen application results in accumulation of ERL1 in  
255 the endoplasmic reticulum.

256 Next, to examine a consequence of inactive ERL1 receptor on its subcellular dynamics,  
257 we applied Stomagen peptide on *tmm* seedlings expressing *ERL1pro::ERL1-YFP* and carefully  
258 reexamined the inner cellular signal. Very faint ring-like structures were highlighted by ERL1-YFP  
259 in both mock and Stomagen-treated meristemoids (Figure S5A). This was enhanced in the *erecta*  
260 *erl1 erl2 tmm* quadruple mutant (Figure 6C). These ERL1-YFP signals co-localized with  
261 Rhodamine B hexyl esters, a dye that stains the endoplasmic reticulum (Figure 6C). Thus, in the  
262 absence of TMM, ERL1 accumulates in the endoplasmic reticulum.

263 To biochemically characterize the effects of Stomagen application and *tmm* mutation on  
264 ERL1 accumulation in the endoplasmic reticulum, we further performed endoglycosidase H  
265 (Endo-H) enzymatic sensitivity assays. Endo-H cleaves N-glycans of proteins in the endoplasm  
266 reticulum, including LRR-RLKs (Jin et al., 2007; Nekrasov et al., 2009), but not the remodeled  
267 glycan chains of proteins transported to the Golgi or further. To detect slight molecular mass  
268 changes, proteins from *erecta erl1 erl2* triple mutant seedlings rescued by *ERL1pro::ERL1-FLAG*  
269 were subjected to Endo-H treatment (see Methods). Under normal conditions, ERL1-FLAG is

270 detected as a single band on immunoblots (Figure 6D, black arrow). The Endo-H digestion  
271 resulted in a faster mobility of ERL1-FLAG protein with at least three different sizes, suggestive  
272 of heterogeneous glycans (Figure 6D, dark gray and light gray arrows). In contrast, ERL1-FLAG  
273 protein from Stomagen-treated seedlings was hypersensitive to Endo-H and cleaved completely  
274 (Figure 6D, light arrow). Likewise, the *tmm* mutation enhanced the Endo-H sensitivity of ERL1  
275 (Figure S5B), indicating increase in endoplasmic reticulum retention.

276 Because exogenous application of Stomagen blocks the activation of ERECTA-family  
277 signaling (Lee et al., 2015) and results in stomatal clustering (Figure 6A), we sought to address if  
278 insufficient internalization of ERL1 from the plasma membrane triggers its stalling in endoplasmic  
279 reticulum. For this purpose, we first treated *erecta erl1 erl2* seedlings expressing ERL1-YFP with  
280 Tyrphostin A23 (Tyr A23), an inhibitor that has been widely used to block clathrin-mediated  
281 endocytosis in plant cells (Banbury et al., 2003; Santuari et al., 2011). Indeed, the TyrA23  
282 treatment enhanced ERL1-YFP signals in the endoplasmic reticulum (Figure 6E, pink arrow),  
283 whereas in mock ERL1-YFP was only detected on the plasma membrane and endosomes.

284 A recent report showed that Tyr A23 functions as a protonophore, which inadvertently  
285 blocks endocytosis through cytoplasmic acidification (Dejonghe et al., 2016). Chemical screening  
286 and subsequent derivatization identified Endosidin 9-17 (ES9-17) as a specific inhibitor of clathrin-  
287 mediated endocytosis without the side effects of cytoplasmic acidification (Dejonghe et al., 2019).  
288 We sought to test the effects of ES9-17 on ERL1-YFP subcellular localization to rule out the  
289 possibility that retention of ERL1-YFP in the endoplasmic reticulum is due to cellular acidification.  
290 ES9-17 previously has been applied only to root cells (Dejonghe et al., 2019). We first optimized  
291 the treatment condition for developing seedling shoots (see Methods). At 100  $\mu$ M, ES9-17  
292 inhibited the internalization of FM4-64 dye in epidermal pavement cells and stomatal-lineage cells,  
293 just like in root cells (Figure S6). Under this condition, ES9-17 treatment caused the accumulation  
294 of ERL1-YFP in the endoplasmic reticulum, just like the Tyr A23 treatment (Figure 6E). Taken  
295 together, our cell biological, pharmacological, and biochemical analyses reveal that inefficient

296 endocytosis due to perception of an antagonistic peptide, Stomagen, as well as loss of co-  
297 receptor TMM, causes ERL1-YFP retention in the endoplasmic reticulum.

298

299

## 300 **Discussion**

301 In this study, we revealed that ERL1 endocytosis accurately reflects EPF signal perception based  
302 on three pieces of evidence (Figure 7): first, both EPF1 and EPFL6 peptides trigger ERL1  
303 endocytosis. Second, in the absence of the co-receptor TMM, ERL1 endocytosis is compromised  
304 and becomes insensitive to EPF1 application. Third, the kinase domain of ERL1 is required for  
305 ERL1 endocytosis. EPF1 and EPFL6 peptide application increased ERL1 population in  
306 endosomes in a dosage-dependent manner (Figures 4, 5). ERL1 population in the Wortmannin  
307 bodies is reduced in absence of TMM whereas the number of ERL1-marked BFA bodies is not  
308 affected (Figures 2, 3), indicating that ERL1 is constitutively recycled whereas the receptor  
309 activation triggers endocytosis to MVB, and eventually to a vacuole. In this aspect, the subcellular  
310 dynamics of ERL1 resembles that of FLS2, which is also constitutively recycled but rapidly  
311 removed from the cell surface upon flg22 perception (Robatzek et al., 2006; Smith et al., 2014).  
312 Unlike FLS2, however, a vast majority of ERL1-YFP signal still remained at the plasma membrane  
313 even after treatment of 5  $\mu$ M MEPP1 (Figure 4). These differences could be attributed to the roles  
314 of FLS2 and ERL1 in immunity vs. development, respectively. FLS2 mediates acute pathogen-  
315 induced defense response, whereas ERL1 likely detects endogenous peptides to influence slower  
316 processes of cell division and differentiation. A recent study showed, however, that defects in the  
317 clathrin-mediated FLS2 endocytosis impair only a subset of FLS2-mediated immune responses  
318 (Mbengue et al., 2016). Thus, the precise contributions of endocytosis and cellular response  
319 remain open questions. Posttranslational modifications, such as phosphorylation and

320 ubiquitination, of the receptors have emerged as key regulators of receptor subcellular dynamics  
321 in FLS2 and BRI1 (Robatzek et al., 2006; Lu et al., 2011; Martins et al., 2015; Zhou et al., 2018).  
322 While specific posttranslational modifications of ERL1 are yet unknown, our finding, that  
323 dominant-negative ERL1 lacking the entire cytoplasmic domain fails to internalize (Figure 3),  
324 suggests that ERL1 phosphorylation may facilitate its endocytosis.

325         It has been shown that EPF1, but not EPFL6, requires TMM for the inhibition of stomatal  
326 development (Hara et al., 2007; Abrash and Bergmann, 2010). Likewise, structural analyses of  
327 the EPF-ERECTA family complexes showed that EPF1, but not EPFL6, requires TMM for binding  
328 to the ectodomain of ERECTA family receptors (Lin et al., 2017). Here, we demonstrate that TMM  
329 is required for endocytosis triggered by EPF1, but not by EPFL6 (Figs. 2, 4 and 5). Thus, at least  
330 two populations of ERL1 receptor complexes must be present on the plasma membrane, with and  
331 without TMM. Indeed, our FRAP analysis detected the different mobility of these two ERL1  
332 compositions on the plasma membrane (Figure 2). Multiple compositions of receptor complexes  
333 have also been reported in CLV3 signaling, where CLV1 homomers, CLV2/CORYNE (CRN)  
334 heterodimers and CLV1/CLV2/CRN multimers co-exist on the plasma membrane (Somssich et  
335 al., 2015). However, only the microdomain-localized CLV1/CLV2/CRN multimers can perceive  
336 the sole ligand CLV3. In the case of BRI1 and FLS2, pre-formed BRI1-BAK1 complex was  
337 detected regardless of BRs whereas FLS2 forms FLS2-BAK1 complex upon flg22 application  
338 (Bücherl et al., 2013; Somssich et al., 2015). These receptor complexes are spatially separated,  
339 even though BRI1 and FLS2 share the same co-receptor BAK1 (Bücherl et al., 2013; Somssich  
340 et al., 2015; Bücherl et al., 2017; Hutten et al., 2017). On the contrary, both compositions of ERL1  
341 complexes are 'functional' and ligand-inducible, as they can perceive EPF1 or EPFL6,  
342 respectively (Figs, 4 and 5). It is possible that the distinct ERL1 receptor complexes reside in  
343 different microdomains on the plasma membrane and undergo different trafficking routes upon  
344 the correlated ligand perception. EPF1 triggers ERL1 association with BAK1 (Meng et al., 2015).  
345 Examining spatiotemporal subcellular dynamics of ERL1 together with TMM and BAK1 at a super

346 resolution scale may reveal the contribution of each receptor complex for specific signal  
347 perception and transduction.

348 Surprisingly, ERL1 is retained in the endoplasmic reticulum when treated with exogenous  
349 Stomagen. Extensive studies support that the steady state of a protein in its subcellular  
350 compartment is interdependent on the anterograde and retrograde trafficking routes (Brandizzi  
351 and Barlowe, 2013). For example, a secretory protein is often retained in the endoplasmic  
352 reticulum when the downstream secretion pathway is compromised (Zheng et al., 2005). Blocking  
353 the endoplasmic reticulum-to-Golgi retrograde trafficking will accelerate protein transport to the  
354 cell surface (Fossati et al., 2014). It is thus possible that Stomagen binding prevents the ERL1  
355 endocytosis and the plasma membrane-accumulated ERL1 interferes with the normal transport  
356 of incoming ERL1 from the endoplasmic reticulum. Two additional pieces of evidence support this  
357 hypothesis. First, when endocytosis is blocked by Tyr A23 (Banbury et al., 2003) or ES7-19, the  
358 improved, specific inhibitor of clathrin heavy chain (Dejonghe et al., 2019), strong ERL1 signals  
359 become evident in the endoplasmic reticulum (Figure 6E). Second, in leaves of the *tmm* mutant,  
360 where EPFL6 is absent and EPF1-triggered ERL1 endocytosis is compromised, ERL1 also  
361 accumulates in the endoplasmic reticulum (Figure 6C and Figure S5). Alternatively, Stomagen-  
362 triggered ERL1 accumulation in endoplasmic reticulum may be highlighting the role of the  
363 endoplasmic reticulum-plasma membrane contact sites as a direct communication link between  
364 the two compartments (Carrasco and Meyer, 2011). The VAP-RELATED SUPPRESSOR OF  
365 TMM (VST) family plasma membrane proteins that interact with integral endoplasmic reticulum  
366 proteins, have been reported to facilitate ERECTA family-mediated signaling in stomatal  
367 development (Ho et al., 2016). Hence, Stomagen perception by the ERL1-TMM complex on the  
368 plasma membrane may directly influence signaling via the contact sites and therefore affect the  
369 secretion of ERL1 to the cell surface.

370 Our work revealed the mechanism by which multiple peptide ligands with distinct activities,  
371 EPF1, EPFL6, and Stomagen, fine-tune stomatal patterning at the level of the subcellular

372 dynamics of a single receptor, ERL1. Successful development of visible functional peptide ligands  
373 and identification of the immediate biochemical events by the ERECTA-family perceiving different  
374 EPF peptides will help elucidate the exact roles of receptor trafficking and signaling specifying  
375 developmental patterning in plants.

376

377

### 378 **Acknowledgements**

379 We thank Prof. Takashi Ueda for RFP-Ara7, Syp43-RFP, and Syp22-RFP lines; Prof. Gian Pietro  
380 Di Sansebastiano for ST-RFP and KDEL-RFP constructs; Prof. Hugo Zheng for N-ST-YFP and  
381 N-YFP-HDEL constructs; Alex Hofstetter for technical assistance of MEPF1 and MEPFL6 peptide  
382 purification; Prof. Jenny Russinova for providing ES9-17 and insightful suggestions on  
383 experimental designs; Drs. Naoyuki Uchida, Ayami Nakagawa, and Soon-Ki Han for critical  
384 comments on the manuscript. This work was supported by the Gordon and Betty Moore  
385 Foundation (GBMF3035) to K.U.T., who is a Howard Hughes Medical Institute Investigator.

386

387

### 388 **Author contributions**

389 Conceived, K.U.T.; Designed experiments, X.Q., K.U.T.; Performed experiments, X.Q.; Peptide  
390 refolding and bioassays, X.Q, M.M.; Debugged and ran FrapBot in a local environment, S.Z.,  
391 K.U.T.; Analyzed data, X.Q., S.Z., K.U.T.; Visualization, X.Q., K.U.T.; Writing- Original Draft, X.Q.,  
392 K.U.T; Writing- Review & Editing, X.Q., M.M., S.Z., K.U.T.; Project Administration, K.U.T.; Funding  
393 Acquisition, K.U.T.

394

395

### 396 **Methods**

397



## 398 **Plant materials and growth conditions**

399 The *Arabidopsis* accession Columbia (Col) was used as wild type. The following mutants and  
400 reporter transgenic plant lines used in this study were reported previously: *erecta* (*er-105*) (Shpak  
401 et al., 2005); *erl1-2* (Shpak et al., 2005); *erl2-1* (Shpak et al., 2005); *epf1-1* (Hara et al., 2007);  
402 *tmm-KO* (Hara et al., 2007); *ERL1pro::ERL1-YFP* in *erl1-2*, *ERL1pro::ERL1-FLAG* in *erl1-2* and  
403 *erecta erl1-2 erl2-1*, and *ERL1pro::ERL1Kinase* in *erl1-2* (Lee et al., 2012); *MUTEpro::ERL1-*  
404 *YFP* in *er-105 erl1-2 erl2-1* and iEPF1 lines (Qi et al., 2017). Transgenic *Arabidopsis* lines  
405 expressing *ARA7pro::mRFP-ARA7*, *SYP22pro::mRFP-SYP22*, and *SYP43pro::mRFP-SYP43*  
406 are a gift from Prof. Takashi Ueda (NIBB, Japan). *ST-RFP* and *KDEL-RFP* constructs are from  
407 Prof. Gian Pietro Di Sansebastiano (Univ. of Salento, Italy). Reporter lines were introduced into  
408 respective mutant backgrounds by genetic crosses or by *Agrobacterium*-mediated floral-dipping  
409 transformation, and genotypes were confirmed by PCR. Seedlings and plants were grown as  
410 described previously (Lee et al., 2012). For a list of PCR-based genotyping primer sequence, see  
411 Table S1.

412

## 413 **Recombinant peptide production**

414 Expression, purification, and refolding of predicted mature EPF1 (MEPF1) or EPFL6 (MEPFL6)  
415 peptides were performed as described previously (Lee et al., 2012), except for the following. His-  
416 tagged MEPF1 or MEPFL6 was affinity purified on 5 ml His-Trap HP column (GE Healthcare)  
417 using NGC<sup>TM</sup> Chromatography System (Bio-Rad). Inclusion bodies from 1.0 L of *E. coli* were  
418 solubilized in guanidine hydrochloride (Gdn-HCl) buffer (6.0 M Gdn-HCl, 500 mM NaCl, 5 mM  
419 imidazole, 1 mM 2-mercaptoethanol, 50 mM Tris, pH 8.0) and loaded onto the column and washed  
420 with 10 column volumes (50 mL) of Wash Buffer (8.0 M urea, 500 mM NaCl, 30 mM imidazole, 1  
421 mM  $\beta$ -mercaptoethanol, 50 mM Tris, pH 8.0) at a flow rate of 3.00 ml/min, and MEPF1 or MEPFL6  
422 peptides were eluted with a 0-100 % gradient of Wash to Elution Buffer (8.0 M urea, 500 mM  
423 NaCl, 500 mM imidazole, 1 mM  $\beta$ -mercaptoethanol, 50 mM Tris, pH 8.0) over 10 column volumes

424 at 3.00 mL/min prior to refolding. The quality of refolded peptide was analyzed by HPLC (Walters  
425 DataPrep 300), its bioactivity was confirmed using Arabidopsis seedlings, and bioassay on  
426 Arabidopsis seedlings were performed as described previously (Lee et al., 2012; Lee et al., 2015).  
427 For the dose-response analysis of EPFL6, the R-package 'drc' (Ritz et al., 2015) was used to fit  
428 the binding curve to the generalized log logistic distribution (Uchida et al., 2018).

429

### 430 **Pharmacological treatment**

431 BFA (Sigma: Cat No. B7651) and Wortmannin (Sigma: Cat No. W1628) were dissolved as 10 mM  
432 stock using ethanol and DMSO, respectively. For BFA treatment, cotyledons of 7-day-old  
433 seedlings were removed, and the rest of the seedlings were immersed into either mock (0.3% of  
434 ethanol), or 30 $\mu$ M BFA solution, vacuumed for 1min, and immersed for 30 min before imaging.  
435 For Wortmannin treatment, seedlings were treated with 25  $\mu$ M Wortmannin in 0.25% DMSO. 0.25%  
436 DMSO solution was used as a mock condition. For MEPF1 and MEPFL6 treatment, purified  
437 peptide solution was diluted to 5  $\mu$ M using liquid  $\frac{1}{2}$  MS media. Cotyledons of 7-day-old seedlings  
438 were removed, and the rest of the seedlings were immersed into the above solutions, vacuumed  
439 for 1 min, and immersed for 10 min before imaging. The same procedure was done for Stomagen  
440 treatment except that the seedlings were immersed into the solution for 1 hour. For co-treatment  
441 of cycloheximide (CHX: Sigma, C4859) and BFA, 7-day-old seedlings, with cotyledons moved,  
442 were immersed into 50  $\mu$ M CHX for 1 hour followed by either mock (0.3% of ethanol), or 30 $\mu$ M  
443 BFA solution, vacuumed for 1min, and immersed for 30 min before imaging.

444 For Tyrphostin A23 (Sigma: Cat No. T7165) treatment, Tyrphostin A23 was dissolved as  
445 50 mM stock using DMSO. 5-day-old seedlings were immersed into either mock (0.1% of DMSO)  
446 or 50  $\mu$ M Tyrphostin A23 solution, vacuumed for 1min, and immersed for 1 hour before imaging.  
447 ES9-17 was generously provided by Dr. Eugenia Russinova (VIB, Gent). As suggested, ES9-17  
448 was dissolved as 50 mM stock using DMSO. For ES9-17 and FM 4-64 treatment on true leaves,  
449 cotyledons of 7-day-old seedlings were removed, and the rest of the seedlings were immersed

450 into either mock (1/2 MS medium with 0.4% of DMSO) or ES9-17 solution (1/2 MS medium with  
451 50  $\mu$ M ES9-17) followed by 5  $\mu$ M FM 4-64 (Thermo Fisher, T13320) staining for 30 min before  
452 imaging. For ES9-17 and FM 4-64 treatment in roots, 3-day-old seedlings were immersed into  
453 either mock (1/2 MS medium with 0.4% of DMSO), or ES9-17 solution (1/2 MS medium with 100  
454  $\mu$ M ES9-17), followed by FM 4-64 (5  $\mu$ M) staining for 30 min before imaging.

455 For Rhodamine B (Sigma: Cat No. R6626) hexyl ester treatment, Rhodamine B hexyl ester  
456 was dissolved as 16mM stock using DMSO. 5-day-old seedlings were immersed into either mock  
457 (1% of DMSO) or 160  $\mu$ M Rhodamine B hexyl ester solution for 30 min before imaging.

458

#### 459 **Protein extraction, enzymatic assay (Endo-H), and protein gel immunoblot analysis**

460 For Endo-H (NEB: Cat No. P0703S) assays, *erecta erl1 erl2* seedlings with functional  
461 *ERL1pro::ERL1-FLAG* were grown on 1/2 MS media plates for 3 days and then transferred to  
462 1/2 MS liquid media with either Tris-HCl buffer (pH 8.8) or 5  $\mu$ M Stomagen peptide in a 24-well  
463 cluster plate at room temperature for one day before being pooled for harvest. Plant materials  
464 were ground in liquid nitrogen, and then extracted with buffer (100 mM Tris-HCl pH 8.8, 150  
465 mM NaCl, 1 mM EDTA, 20% glycerol, 20 mM NaF, 2 mM Na<sub>3</sub>VO<sub>4</sub>, 1 mM PMSF, 1% Triton X-  
466 100, 1 tablet per 50 ml extraction buffer of cOmplete™ proteinase inhibitor cocktail, Roche).  
467 The extracts were briefly sonicated at 4 °C and centrifuged at 4,000 r.p.m. for 10min at 4 °C to  
468 remove cell debris. The supernatant was then ultracentrifuged at 100,000g for 30min at 4 °C.  
469 Total protein concentration was determined using a Bradford assay (Bio-Rad: Cat No. 5000006)  
470 before adjustment. The solution was incubated with Dynabeads Protein G (Invitrogen: Cat No.  
471 10004D) conjugated with mouse monoclonal anti-FLAG M2 (Sigma: Cat No. F-3165) for 2  
472 hours with slow rotation at 4 °C, followed by washing with TBS with 0.1% Tween 20. The  
473 immunoprecipitates were eluted with 2x SDS sample buffer (100 mM Tris-HCl at pH 6.8, 4%  
474 SDS, 0.02% Bromophenol Blue, 20% glycerol, 2% 2-mercaptoethanol, 1% proteinase inhibitor  
475 cocktail) by boiling for 10 min. Each immunoprecipitate was then separated into two aliquots,

476 treated with either water or Endo-H for 10min at 37 °C. Immunoblot analysis was performed  
477 using mouse monoclonal anti-FLAG M2 (Sigma: Cat No. F-3165; 1:5,000) antibody as primary  
478 antibody, and horseradish peroxidase-conjugated goat anti-mouse IgG (GE Healthcare: Cat  
479 No. NA931VS; 1:50,000) as secondary antibody. For loading control, immunoblot was  
480 performed using mouse anti-tubulin (Millipore Sigma: Cat No. MABT205; 1:5000). The protein  
481 blots were visualized using Chemiluminescence assay kit (Thermo Scientific: Cat No. 34095).

482

### 483 **Confocal microscopy and image analysis**

484 Confocal microscopy images were taken on the Leica SP5X-WLL inverted confocal microscope  
485 (Solms, Germany). Time-lapse imaging of ERL1-YFP true leaves was prepared as described  
486 previously (Peterson and Torii, 2012). ERL1-YFP internalization imaging was done with a 63x/1.2  
487 W Corr lens on Leica SP5X. 514 nm laser was used to excite YFP and emission window of 518-  
488 600 nm was used to collect YFP signal. For the multicolor images of YFP and RFP, true leaves  
489 of 7-day-old transgenic seedlings were observed with a 63x/1.2 W Corr lens on Leica SP5X.  
490 514nm laser was used to excite YFP and 555nm laser was used to excite RFP and FM4-64.  
491 Emission filter was set as 518nm-550nm for YFP and 573-630 for RFP and FM4-64. Each  
492 experiment was repeated at least three times, each with multiple seedlings. The Leica LAS AF  
493 software (<http://www.leica-microsystems.com>) and Imaris 8.1 (Bitplane) were used for post-  
494 acquisition image processing.

495

### 496 **Fluorescence Recovery After Photobleaching (FRAP) analysis**

497 The FRAP experiments were conducted on ERL1-YFP using a 63x/1.2 W Corr lens on the Leica  
498 SP5X confocal microscope by photobleaching ~10% of the plasma membrane with 100% 405 nm  
499 laser power. 514 nm laser was used to excite YFP and emission window of 518-600 was used to  
500 collect YFP signal. Recovery of fluorescence was monitored in the photobleached plasma  
501 membrane for 6 min with 3-second intervals. A non-photobleached region was monitored

502 meanwhile as an internal control. Average intensities of the region of interest were quantified with  
503 Leica LAS AF software. The exported data was analyzed and modeled by using the R-based  
504 FrapBot software ([www.frapbot.kohze.com](http://www.frapbot.kohze.com)) (Kohze et al., 2017) with some modification to run on  
505 the local lab computer. The FRAP recovery curves were fitted to a single-parameter exponential  
506 model to determine the half time.

507

### 508 **Data plots and Statistics**

509 Graphs were generated using R ggplot2. For box plots and violin plots, individual data points are  
510 plotted as dot plots. For the violin plots with large sample numbers, the dot plots were jittered with  
511 a position of 0.2. All statistical analyses were performed using R. All codes are available upon  
512 request.

513

514 **References**

- 515 **Abrash, E.B., and Bergmann, D.C.** (2010). Regional specification of stomatal production by the  
516 putative ligand CHALLAH. *Development* **137**, 447-455.
- 517 **Abrash, E.B., Davies, K.A., and Bergmann, D.C.** (2011). Generation of signaling specificity in  
518 Arabidopsis by spatially restricted buffering of ligand-receptor interactions. *Plant Cell* **23**,  
519 2864-2879.
- 520 **Banbury, D.N., Oakley, J.D., Sessions, R.B., and Banting, G.** (2003). Tyrphostin A23 inhibits  
521 internalization of the transferrin receptor by perturbing the interaction between tyrosine  
522 motifs and the medium chain subunit of the AP-2 adaptor complex. *J Biol Chem* **278**,  
523 12022-12028.
- 524 **Beck, M., Zhou, J., Faulkner, C., MacLean, D., and Robatzek, S.** (2012). Spatio-temporal  
525 cellular dynamics of the Arabidopsis flagellin receptor reveal activation status-dependent  
526 endosomal sorting. *Plant Cell* **24**, 4205-4219.
- 527 **Ben Khaled, S., Postma, J., and Robatzek, S.** (2015). A moving view: subcellular trafficking  
528 processes in pattern recognition receptor-triggered plant immunity. *Annu Rev Phytopathol*  
529 **53**, 379-402.
- 530 **Brandizzi, F., and Barlowe, C.** (2013). Organization of the ER-Golgi interface for membrane  
531 traffic control. *Nat Rev Mol Cell Biol* **14**, 382-392.
- 532 **Bücherl, C.A., Jarsch, I.K., Schudoma, C., Segonzac, C., Mbengue, M., Robatzek, S.,  
533 MacLean, D., Ott, T., and Zipfel, C.** (2017). Plant immune and growth receptors share  
534 common signalling components but localise to distinct plasma membrane nanodomains.  
535 *Elife* **6**.
- 536 **Bücherl, C.A., van Esse, G.W., Kruis, A., Luchtenberg, J., Westphal, A.H., Aker, J., van Hoek,  
537 A., Albrecht, C., Borst, J.W., and de Vries, S.C.** (2013). Visualization of BRI1 and  
538 BAK1(SERK3) membrane receptor heterooligomers during brassinosteroid signaling.  
539 *Plant Physiol* **162**, 1911-1925.
- 540 **Carrasco, S., and Meyer, T.** (2011). STIM proteins and the endoplasmic reticulum-plasma  
541 membrane junctions. *Annu Rev Biochem* **80**, 973-1000.
- 542 **Chinchilla, D., Zipfel, C., Robatzek, S., Kemmerling, B., Nurnberger, T., Jones, J.D., Felix,  
543 G., and Boller, T.** (2007). A flagellin-induced complex of the receptor FLS2 and BAK1  
544 initiates plant defence. *Nature* **448**, 497-500.
- 545 **Clark, S.E., Williams, R.W., and Meyerowitz, E.M.** (1997). The CLAVATA1 gene encodes a  
546 putative receptor kinase that controls shoot and floral meristem size in Arabidopsis. *Cell*  
547 **89**, 575-585.
- 548 **Dejonghe, W., Sharma, I., Denoo, B., De Munck, S., Lu, Q., Mishev, K., Bulut, H., Mylle, E.,  
549 De Rycke, R., Vasileva, M., Savatin, D.V., Nerinckx, W., Staes, A., Drozdzecki, A.,  
550 Audenaert, D., Yperman, K., Madder, A., Friml, J., Van Damme, D., Gevaert, K.,  
551 Haucke, V., Savvides, S.N., Winne, J., and Russinova, E.** (2019). Disruption of  
552 endocytosis through chemical inhibition of clathrin heavy chain function. *Nat Chem Biol*  
553 **15**, 641-649.
- 554 **Dejonghe, W., Kuenen, S., Mylle, E., Vasileva, M., Keech, O., Viotti, C., Swerts, J., Fendrych,  
555 M., Ortiz-Morea, F.A., Mishev, K., Delang, S., Scholl, S., Zarza, X., Heilmann, M.,  
556 Kourelis, J., Kasproicz, J., Nguyen, I.S., Drozdzecki, A., Van Houtte, I., Szatmári,  
557 A.M., Majda, M., Baisa, G., Bednarek, S.Y., Robert, S., Audenaert, D., Testerink, C.,  
558 Munnik, T., Van Damme, D., Heilmann, I., Schumacher, K., Winne, J., Friml, J.,  
559 Verstreken, P., and Russinova, E.** (2016). Mitochondrial uncouplers inhibit clathrin-  
560 mediated endocytosis largely through cytoplasmic acidification. *Nat Commun* **7**, 11710.
- 561 **Foissner, I., Sommer, A., Hoefftberger, M., Hoepflinger, M.C., and Absolonova, M.** (2016). Is  
562 Wortmannin-Induced Reorganization of the trans-Golgi Network the Key to Explain  
563 Charasome Formation? *Front Plant Sci* **7**, 756.

- 564 **Fossati, M., Colombo, S.F., and Borgese, N.** (2014). A positive signal prevents secretory  
565 membrane cargo from recycling between the Golgi and the ER. *EMBO J* **33**, 2080-2097.
- 566 **Geldner, N., and Robatzek, S.** (2008). Plant receptors go endosomal: a moving view on signal  
567 transduction. *Plant Physiol* **147**, 1565-1574.
- 568 **Geldner, N., Hyman, D.L., Wang, X., Schumacher, K., and Chory, J.** (2007). Endosomal  
569 signaling of plant steroid receptor kinase BRI1. *Genes Dev* **21**, 1598-1602.
- 570 **Geldner, N., Anders, N., Wolters, H., Keicher, J., Kornberger, W., Muller, P., Delbarre, A.,  
571 Ueda, T., Nakano, A., and Jürgens, G.** (2003). The Arabidopsis GNOM ARF-GEF  
572 mediates endosomal recycling, auxin transport, and auxin-dependent plant growth. *Cell*  
573 **112**, 219-230.
- 574 **Hara, K., Kajita, R., Torii, K.U., Bergmann, D.C., and Kakimoto, T.** (2007). The secretory  
575 peptide gene EPF1 enforces the stomatal one-cell-spacing rule. *Genes Dev* **21**, 1720-  
576 1725.
- 577 **Hara, K., Yokoo, T., Kajita, R., Onishi, T., Yahata, S., Peterson, K.M., Torii, K.U., and  
578 Kakimoto, T.** (2009). Epidermal cell density is autoregulated via a secretory peptide,  
579 EPIDERMAL PATTERNING FACTOR 2 in Arabidopsis leaves. *Plant Cell Physiol* **50**,  
580 1019-1031.
- 581 **Ho, C.M., Paciorek, T., Abrash, E., and Bergmann, D.C.** (2016). Modulators of Stomatal  
582 Lineage Signal Transduction Alter Membrane Contact Sites and Reveal Specialization  
583 among ERECTA Kinases. *Dev Cell* **38**, 345-357.
- 584 **Hunt, L., and Gray, J.E.** (2009). The signaling peptide EPF2 controls asymmetric cell divisions  
585 during stomatal development. *Curr Biol* **19**, 864-869.
- 586 **Hutten, S.J., Hamers, D.S., Aan den Toorn, M., van Esse, W., Nolles, A., Bücherl, C.A., de  
587 Vries, S.C., Hohlbein, J., and Borst, J.W.** (2017). Visualization of BRI1 and  
588 SERK3/BAK1 Nanoclusters in Arabidopsis Roots. *PLoS One* **12**, e0169905.
- 589 **Jin, H., Yan, Z., Nam, K.H., and Li, J.** (2007). Allele-specific suppression of a defective  
590 brassinosteroid receptor reveals a physiological role of UGGT in ER quality control. *Mol*  
591 *Cell* **26**, 821-830.
- 592 **Kohze, R., Dieteren, C.E.J., Koopman, W.J.H., Brock, R., and Schmidt, S.** (2017). Frapbot:  
593 An open-source application for FRAP data. *Cytometry A* **91**, 810-814.
- 594 **Kondo, T., Kajita, R., Miyazaki, A., Hokoyama, M., Nakamura-Miura, T., Mizuno, S., Masuda,  
595 Y., Irie, K., Tanaka, Y., Takada, S., Kakimoto, T., and Sakagami, Y.** (2010). Stomatal  
596 density is controlled by a mesophyll-derived signaling molecule. *Plant Cell Physiol* **51**, 1-  
597 8.
- 598 **Lau, O.S., and Bergmann, D.C.** (2012). Stomatal development: a plant's perspective on cell  
599 polarity, cell fate transitions and intercellular communication. *Development* **139**, 3683-  
600 3692.
- 601 **Lee, J.S., Hnilova, M., Maes, M., Lin, Y.C., Putarjunan, A., Han, S.K., Avila, J., and Torii, K.U.**  
602 (2015). Competitive binding of antagonistic peptides fine-tunes stomatal patterning.  
603 *Nature* **522**, 439-443.
- 604 **Lee, J.S., Kuroha, T., Hnilova, M., Khatayevich, D., Kanaoka, M.M., McAbee, J.M., Sarikaya,  
605 M., Tamerler, C., and Torii, K.U.** (2012). Direct interaction of ligand-receptor pairs  
606 specifying stomatal patterning. *Genes Dev* **26**, 126-136.
- 607 **Li, J., Wen, J., Lease, K.A., Doke, J.T., Tax, F.E., and Walker, J.C.** (2002). BAK1, an  
608 Arabidopsis LRR receptor-like protein kinase, interacts with BRI1 and modulates  
609 brassinosteroid signaling. *Cell* **110**, 213-222.
- 610 **Lin, G., Zhang, L., Han, Z., Yang, X., Liu, W., Li, E., Chang, J., Qi, Y., Shpak, E.D., and Chai,  
611 J.** (2017). A receptor-like protein acts as a specificity switch for the regulation of stomatal  
612 development. *Genes Dev* **31**, 927-938.

- 613 **Lu, D., Lin, W., Gao, X., Wu, S., Cheng, C., Avila, J., Heese, A., Devarenne, T.P., He, P., and**  
614 **Shan, L.** (2011). Direct ubiquitination of pattern recognition receptor FLS2 attenuates  
615 plant innate immunity. *Science* **332**, 1439-1442.
- 616 **Macho, A.P., and Zipfel, C.** (2014). Plant PRRs and the activation of innate immune signaling.  
617 *Mol Cell* **54**, 263-272.
- 618 **Martins, S., Dohmann, E.M., Cayrel, A., Johnson, A., Fischer, W., Pojer, F., Satiat-**  
619 **Jeunemaître, B., Jaillais, Y., Chory, J., Geldner, N., and Vert, G.** (2015). Internalization  
620 and vacuolar targeting of the brassinosteroid hormone receptor BRI1 are regulated by  
621 ubiquitination. *Nat Commun* **6**, 6151.
- 622 **Mbengue, M., Bourdais, G., Gervasi, F., Beck, M., Zhou, J., Spallek, T., Bartels, S., Boller,**  
623 **T., Ueda, T., Kuhn, H., and Robotzek, S.** (2016). Clathrin-dependent endocytosis is  
624 required for immunity mediated by pattern recognition receptor kinases. *Proc Natl Acad*  
625 *Sci U S A* **113**, 11034-11039.
- 626 **Meckel, T., Hurst, A.C., Thiel, G., and Homann, U.** (2004). Endocytosis against high turgor:  
627 intact guard cells of *Vicia faba* constitutively endocytose fluorescently labelled plasma  
628 membrane and GFP-tagged K-channel KAT1. *Plant J* **39**, 182-193.
- 629 **Meng, X., Chen, X., Mang, H., Liu, C., Yu, X., Gao, X., Torii, K.U., He, P., and Shan, L.** (2015).  
630 Differential Function of Arabidopsis SERK Family Receptor-like Kinases in Stomatal  
631 Patterning. *Curr Biol* **25**, 2361-2372.
- 632 **Nam, K.H., and Li, J.** (2002). BRI1/BAK1, a receptor kinase pair mediating brassinosteroid  
633 signaling. *Cell* **110**, 203-212.
- 634 **Nekrasov, V., Li, J., Batoux, M., Roux, M., Chu, Z.H., Lacombe, S., Rougon, A., Bittel, P.,**  
635 **Kiss-Papp, M., Chinchilla, D., van Esse, H.P., Jorda, L., Schwessinger, B., Nicaise,**  
636 **V., Thomma, B.P., Molina, A., Jones, J.D., and Zipfel, C.** (2009). Control of the pattern-  
637 recognition receptor EFR by an ER protein complex in plant immunity. *EMBO J* **28**, 3428-  
638 3438.
- 639 **Nimchuk, Z.L., Tarr, P.T., Ohno, C., Qu, X., and Meyerowitz, E.M.** (2011). Plant stem cell  
640 signaling involves ligand-dependent trafficking of the CLAVATA1 receptor kinase. *Curr*  
641 *Biol* **21**, 345-352.
- 642 **Peterson, K.M., and Torii, K.U.** (2012). Long-term, high-resolution confocal time lapse imaging  
643 of Arabidopsis cotyledon epidermis during germination. *J Vis Exp*.
- 644 **Pillitteri, L.J., and Torii, K.U.** (2012). Mechanisms of stomatal development. *Annu Rev Plant*  
645 *Biol* **63**, 591-614.
- 646 **Qi, X., Han, S.K., Dang, J.H., Garrick, J.M., Ito, M., Hofstetter, A.K., and Torii, K.U.** (2017).  
647 Autocrine regulation of stomatal differentiation potential by EPF1 and ERECTA-LIKE1  
648 ligand-receptor signaling. *Elife* **6**.
- 649 **Ritz, C., Baty, F., Streibig, J.C., and Gerhard, D.** (2015). Dose-Response Analysis Using R.  
650 *PLoS One* **10**, e0146021.
- 651 **Robotzek, S., Chinchilla, D., and Boller, T.** (2006). Ligand-induced endocytosis of the pattern  
652 recognition receptor FLS2 in Arabidopsis. *Genes Dev* **20**, 537-542.
- 653 **Rychel, A.L., Peterson, K.M., and Torii, K.U.** (2010). Plant twitter: ligands under 140 amino  
654 acids enforcing stomatal patterning. *J Plant Res* **123**, 275-280.
- 655 **Santuari, L., Scacchi, E., Rodriguez-Villalon, A., Salinas, P., Dohmann, E.M., Brunoud, G.,**  
656 **Vernoux, T., Smith, R.S., and Hardtke, C.S.** (2011). Positional information by differential  
657 endocytosis splits auxin response to drive Arabidopsis root meristem growth. *Curr Biol* **21**,  
658 1918-1923.
- 659 **Shiu, S.H., and Bleecker, A.B.** (2001). Plant receptor-like kinase gene family: diversity, function,  
660 and signaling. *Sci STKE* **2001**, re22.
- 661 **Shpak, E.D., Lakeman, M.B., and Torii, K.U.** (2003). Dominant-negative receptor uncovers  
662 redundancy in the Arabidopsis ERECTA Leucine-rich repeat receptor-like kinase signaling  
663 pathway that regulates organ shape. *Plant Cell* **15**, 1095-1110.



- 664 **Shpak, E.D., McAbee, J.M., Pillitteri, L.J., and Torii, K.U.** (2005). Stomatal patterning and  
665 differentiation by synergistic interactions of receptor kinases. *Science* **309**, 290-293.
- 666 **Sigismund, S., Confalonieri, S., Ciliberto, A., Polo, S., Scita, G., and Di Fiore, P.P.** (2012).  
667 Endocytosis and signaling: cell logistics shape the eukaryotic cell plan. *Physiol Rev* **92**,  
668 273-366.
- 669 **Smith, J.M., Salamango, D.J., Leslie, M.E., Collins, C.A., and Heese, A.** (2014). Sensitivity to  
670 Flg22 is modulated by ligand-induced degradation and de novo synthesis of the  
671 endogenous flagellin-receptor FLAGELLIN-SENSING2. *Plant Physiol* **164**, 440-454.
- 672 **Somssich, M., Ma, Q., Weidtkamp-Peters, S., Stahl, Y., Felekyan, S., Bleckmann, A., Seidel,  
673 C.A., and Simon, R.** (2015). Real-time dynamics of peptide ligand-dependent receptor  
674 complex formation in planta. *Sci Signal* **8**, ra76.
- 675 **Sugano, S.S., Shimada, T., Imai, Y., Okawa, K., Tamai, A., Mori, M., and Hara-Nishimura, I.**  
676 (2010). Stomagen positively regulates stomatal density in Arabidopsis. *Nature* **463**, 241-  
677 244.
- 678 **Torii, K.U.** (2004). Leucine-rich repeat receptor kinases in plants: structure, function, and signal  
679 transduction pathways. *Int Rev Cytol* **234**, 1-46.
- 680 **Uchida, N., Lee, J.S., Horst, R.J., Lai, H.H., Kajita, R., Kakimoto, T., Tasaka, M., and Torii,  
681 K.U.** (2012). Regulation of inflorescence architecture by intertissue layer ligand-receptor  
682 communication between endodermis and phloem. *Proc Natl Acad Sci U S A* **109**, 6337-  
683 6342.
- 684 **Uchida, N., Takahashi, K., Iwasaki, R., Yamada, R., Yoshimura, M., Endo, T.A., Kimura, S.,  
685 Zhang, H., Nomoto, M., Tada, Y., Kinoshita, T., Itami, K., Hagihara, S., and Torii, K.U.**  
686 (2018). Chemical hijacking of auxin signaling with an engineered auxin-TIR1 pair. *Nat*  
687 *Chem Biol* **14**, 299-305.
- 688 **Zheng, H., Camacho, L., Wee, E., Batoko, H., Legen, J., Leaver, C.J., Malho, R., Hussey, P.J.,  
689 and Moore, I.** (2005). A Rab-E GTPase mutant acts downstream of the Rab-D subclass  
690 in biosynthetic membrane traffic to the plasma membrane in tobacco leaf epidermis. *Plant*  
691 *Cell* **17**, 2020-2036.
- 692 **Zhou, J., Liu, D., Wang, P., Ma, X., Lin, W., Chen, S., Mishev, K., Lu, D., Kumar, R., Vanhoutte,  
693 I., Meng, X., He, P., Russinova, E., and Shan, L.** (2018). Regulation of Arabidopsis  
694 brassinosteroid receptor BRI1 endocytosis and degradation by plant U-box  
695 PUB12/PUB13-mediated ubiquitination. *Proc Natl Acad Sci U S A* **115**, E1906-E1915.

696

697

698

## 699 **Figure Legend**

700

### 701 **Figure 1. ERL1-YFP has dual localization on plasma membrane and late endosomes**

702 **(A)** Representative confocal microscope images of ERL1-YFP (top row) co-localization analysis  
703 with the TGN marker Syp43-RFP (left column), the MVB marker RFP-Ara7 (middle column), and  
704 the MVB and vacuole marker Syp22-RFP (right column) in the abaxial epidermis of developing

705 true leaves of the 7-day-old seedlings. Merged images are shown in the third row, with enlarged  
706 images of representative meristemoids in the bottom row. Arrowheads point to endosomes  
707 bearing ERL1-YFP, RFP-Syp43, RFP-Ara7, and/or RFP-Syp22: cyan, single channels (top two  
708 rows); green, YFP; magenta, RFP; white, co-localization (bottom two rows). Scale bars = 10  $\mu$ m.  
709 **(B)** Quantitative analysis of the co-localized endosomes between ERL1-YFP and the subcellular  
710 marker proteins. Percentage of the endosomes of the former protein that co-localize with the latter  
711 protein is shown as dots. Lines in the boxplot show the median value of each group, and the  
712 boxes represent from the first to third quartiles. n = 40 for ERL1 vs Ara7 or Ara7 vs ERL1; n = 12  
713 for ERL1 vs Syp43 or Syp43 vs ERL1; n=7 for ERL1 vs Syp22 or Syp22 vs ERL1.  
714 **(C)** ERL1-YFP and RFP-Ara7 treated with Wm. Shown are ERL1-YFP (left column) and RFP-  
715 Ara7 (middle column) in the abaxial epidermis of developing true leaves of the 7-day-old seedlings  
716 treated with mock (top row) or 30  $\mu$ M Wm (bottom row). Arrowheads point to ERL1-YFP and/or  
717 RFP-Ara7 endosomes: cyan, single channels; magenta, YFP; white, co-localization. Scale bars  
718 = 10  $\mu$ m.

719

## 720 **Figure 2. ERL1 internalization requires its co-receptor TMM**

721 **(A)** Representative confocal microscopy images of ERL1-YFP in *erl1* (top row) and in *erl1 tmm*  
722 (bottom row) in the abaxial epidermis of developing true leaves of the 7-day-old seedlings. Right  
723 column; enlarged images. Their stomatal phenotypes are shown on the left column. Orange  
724 brackets: clustered stomata. Arrowheads indicate endosomes. Scale bars =10  $\mu$ m.

725 **(B)** Representative images of ERL1-YFP in *erl1* (top row) or in *erl1 tmm* (bottom row) of the  
726 abaxial epidermis of developing true leaves from the 7-day-old seedlings treated with mock (left  
727 column) or 30  $\mu$ M BFA (right column). Arrowheads indicate BFA bodies. Scale bars =10  $\mu$ m.

728 **(C)** Quantitative analysis of the number of cells with BFA bodies when ERL1-YFP in *erl1* (yellow)  
729 or *erl1 tmm* (orange) are treated with mock or 30  $\mu$ M BFA. Lines in the boxplot show the median  
730 value. ANOVA was performed for comparing all samples, and Student's T-test was performed for

731 pairwise comparisons. ns, not significant. \*  $p < 0.05$ . \*\*\*  $p < 0.0005$   $n = 3$  independent experiments.

732 For each experiment, the total numbers of cells counted are 86, 130, 66 (WT mock); 138, 94, 131

733 (*tmm* mock); 230, 336, 109 (WT BFA); 300, 393, 211 (*tmm* BFA).

734 (D) Representative images of ERL1-YFP in *erl1* (top row) or in *erl1 tmm* (bottom row) treated with

735 mock (left column) or 25  $\mu\text{M}$  Wm (right column). Arrowheads indicate Wm bodies. Scale bars = 10

736  $\mu\text{m}$ .

737 (E) Quantitative analysis of the number of cells with Wm bodies when ERL1-YFP in *erl1* (yellow)

738 or *erl1 tmm* (orange) are treated with mock or 25  $\mu\text{M}$  Wm. Lines in the boxplot show the median

739 value. ANOVA was performed for comparing all samples, and Student's T-test was performed for

740 pairwise comparisons between *erl1* and *erl1 tmm*. \*  $p < 0.05$ . \*\*\*  $p < 0.0005$   $n = 3$  independent

741 experiments. For each experiment, the total numbers of cells counted are 155, 73, 62 (WT mock);

742 181, 126, 104 (*tmm* mock); 184, 136, 176 (WT Wm); 1043, 273, 83 (*tmm* BFA).

743 (F) FRAP analyses of plasma membrane ERL1-YFP in wild type (*erl1-2*) or in *tmm* (*erl1-2 tmm*).

744 Shown are representative fluorescence recovery curves plotted as a function of time and fitted to

745 Single Exponential Fitting. ERL1-YFP in *erl1* (top; yellow); ERL1-YFP in *erl1 tmm* (bottom;

746 orange).

747 (G) Quantitative analysis of the half time of fluorescence recovery of plasma membrane ERL1-

748 YFP in *erl1* (yellow) and *erl1 tmm* (orange). Lines in the boxplot show the median value. T-test

749 was performed for pairwise comparisons between *erl1* and *erl1 tmm*.  $n = 3$  for WT and  $n = 9$  for *tmm*.

750

### 751 **Figure 3. ERL1 internalization requires its functionality**

752 (A) Diagram of the full-length ERL1 protein (top) and the dominant-negative ERL1 protein lacking

753 the cytoplasmic domain (bottom).

754 (B) Representative confocal microscopy images of cotyledon abaxial epidermis from the 4-day-

755 old seedlings of wild type (top left), *epf1* (top right), ERL1-YFP *erl1* (bottom left) and ERL1 $\Delta$ K-

756 CFP *erl1* (bottom right), stained by PI. Brackets indicate the paired stomata in *epf1* and ERL1ΔK  
757 -CFP in *erl1*. Scale bars =10 μm.

758 **(C)** Representative confocal microscopy images of ERL1ΔK-CFP in *erl1* of the abaxial developing  
759 true leaf epidermis from the 7-day-old seedlings. Right, the enlarged image from the highlighted  
760 area (left, white rectangle). Scale bars =10 μm.

761 **(D)** Representative confocal microscopy images of ERL1ΔK-CFP treated with mock (top left for  
762 BFA treatment), 30 μM BFA (top right), mock (bottom left for Wm treatment) and 25 μM Wm  
763 (bottom right). Arrowheads indicate BFA bodies. Scale bars =10 μm.

764 **(E)** Representative images of ERL1-YFP in *erl1* (upper row) and ERL1ΔK-CFP in *erl1* (bottom  
765 row) stained with an endocytosis monitoring membrane dye, FM4-64, in the abaxial epidermis of  
766 developing true leaves of the 7-day-old seedlings. Arrowheads indicate internalized endosomes.

767 **(F)** Quantitative analysis of the number of ERL1-YFP-positive BFA- or Wm bodies per cell shown  
768 as a violin plot. Individual data points are dot-plotted with jitter. Median values are shown as lines  
769 in the boxplot. ANOVA was performed for comparing all samples, and T-test was performed for  
770 the pairwise comparison of mock and drug-treated samples. p values were indicated between  
771 every two compared samples. n = 36 for mock (BFA); n = 29 for BFA; n = 44 for mock (Wm); n =  
772 66 for Wm.

773 **(G)** Quantitative analysis of the percentage of cells with BFA bodies (green) or Wm bodies (purple)  
774 when ERL1ΔK-CFP are treated with mock, 30 μM BFA or mock, 25 μM Wm.

775

776 **Figure 4. MEPP1 triggers ERL1-YFP internalization in *erl1* but not in *erl1 tmm***

777 **(A)** Representative confocal microscopy images of cotyledon abaxial epidermis from the 4-day-  
778 old *iEPF1* seedlings treated with mock (left) or 10 μM Estradiol (right). Scale bars =10 μm.

779 **(B)** Representative confocal microscopy images of cotyledon abaxial epidermis from the 4-day-  
780 old *iEPF1* in *tmm* seedlings treated with mock/DMSO (left) or 10  $\mu$ M Estradiol (right). Brackets  
781 indicate clustered stomata in both mock- and estradiol-induced samples. Scale bars =10  $\mu$ m.

782 **(C)** Representative confocal microscopy images of ERL1-YFP in *erl1* treated with mock (top left),  
783 1  $\mu$ M MEPF1 (top right), 2.5  $\mu$ M MEPF1 (bottom left) and 5  $\mu$ M MEPF1 (bottom right) are shown.  
784 Arrowheads indicate endosomes. Scale bars = 10  $\mu$ m.

785 **(D)** Representative confocal microscopy images of ERL1-YFP in *erl1 tmm* treated with mock (top  
786 left), 1  $\mu$ M MEPF1 (top right), 2.5  $\mu$ M MEPF1 (bottom left) and 5  $\mu$ M MEPF1 (bottom right) are  
787 shown. Arrowheads indicate endosomes. Scale bars = 10  $\mu$ m.

788 **(E)** Quantitative analysis of the number of ERL1-YFP-positive endosomes per cell at different  
789 concentrations of MEPF1 application in *erl1* shown as a violin plot. Dots, individual data points.  
790 Median values are shown as lines in the boxplot, and mean values are shown as yellow dots in  
791 the plot. ANOVA was performed for comparing all samples, and T-test was performed for pairwise  
792 comparisons of samples treated with the mock and different concentration of MEPF1. n= 79, 27,  
793 38, 82 for treatment with mock, 1  $\mu$ M, 2.5  $\mu$ M, 5 $\mu$ M MEPF1.

794 **(F)** Quantitative analysis of the number of ERL1-YFP-positive endosomes per cell at different  
795 concentrations of MEPF1 application in *erl1 tmm* shown as a violin plot. Dots, individual data  
796 points. Median values are shown as lines in the boxplot, and mean values are shown as yellow  
797 dots in the plot. ANOVA was performed for comparing all samples, and T-test was performed for  
798 pairwise comparisons of samples treated with the mock and different concentration of MEPF1.  
799 n= 76, 113, 109, 114 for treatment with mock, 1  $\mu$ M, 2.5  $\mu$ M, and 5 $\mu$ M MEPF1, respectively.

800

801 **Figure 5. MEPFL6 triggers ERL1-YFP internalization in both *erl1* and *erl1 tmm***

802 **(A)** Representative confocal microscopy images of cotyledon abaxial epidermis from the 5-day-  
803 old wild type seedlings treated with mock (left) or 5  $\mu$ M MEPFL6 (right). Scale bars =10  $\mu$ m.

804 **(B)** Shown are representative confocal microscopy images of cotyledon abaxial epidermis from  
805 the 5-day-old *tmm* seedlings treated with mock (left) or 5  $\mu$ M MEPFL6 (right). Scale bar =10  $\mu$ m.

806 **(C)** Representative images of ERL1-YFP in *erl1* treated with mock (top left), 1  $\mu$ M MEPFL6 (top  
807 right), 2.5  $\mu$ M MEPFL6 (bottom left) and 5  $\mu$ M MEPFL6 (bottom right) are shown. Arrowheads  
808 indicate endosomes. Scale bar = 10  $\mu$ m.

809 **(D)** Representative images of ERL1-YFP in *erl1 tmm* treated with mock (top left), 1  $\mu$ M MEPFL6  
810 (top right), 2.5  $\mu$ M MEPFL6 (bottom left) and 5  $\mu$ M MEPFL6 (bottom right) are shown. Arrowheads  
811 indicate endosomes. Scale bars = 10  $\mu$ m.

812 **(E)** Quantitative analysis of the number of ERL1-YFP-positive endosomes per cell at different  
813 concentrations of MEPFL6 application in *erl1* shown as a Violin plot. Median values are shown  
814 as lines in the boxplot, and mean values are shown as yellow dots in the plot. Dots, individual  
815 data points. ANOVA was performed for comparing all samples, and T-test was performed for a  
816 pairwise comparisons of samples treated with the mock and different concentration of MEPFL6.  
817 p values were indicated for every pairwise comparison. n= 37, 28, 27, 30 for treatment with mock,  
818 1  $\mu$ M, 2.5  $\mu$ M, 5  $\mu$ M MEPFL6.

819 **(F)** Quantitative analysis of the number of ERL1-YFP-positive endosomes per cell at different  
820 concentrations of MEPFL6 application in *erl1 tmm* shown as a Violin plot. Dots, individual data  
821 points. Median values are shown as lines in the boxplot, and mean values are shown as yellow  
822 dots in the plot. ANOVA was performed for comparing all samples, and T-test was performed for  
823 a pairwise comparisons of samples treated with the mock and different concentration of MEPFL6.  
824 P values were indicated between every two compared samples. n= 55, 63, 48, 35 for treatment  
825 with mock, 1  $\mu$ M, 2.5  $\mu$ M, 5  $\mu$ M MEPFL6.

826

827 **Figure 6. Stomagen application confers accumulation of ERL1 in endoplasmic reticulum**

828 **(A)** Representative confocal microscopy images of cotyledon abaxial epidermis from the 5-day-  
829 old wild type seedlings (left two) or *tmm* seedlings (right two) treated with mock (first and third  
830 from the left) or 5  $\mu$ M Stomagen (second and forth from the left). Scale bars = 10  $\mu$ m.

831 **(B)** Representative confocal microscopy images of ERL1-YFP (left column) and co-localization  
832 analysis with the endoplasmic reticulum marker RFP-KDEL (second left column) in the abaxial  
833 epidermis of cotyledons of the 5-day-old *erecta* (*er*) *erl1 erl2* seedlings treated with mock (top row)  
834 or 5  $\mu$ M Stomagen (bottom row). Merged images are shown in the third left column. Fourth column  
835 shows the line slicing along which quantification analysis of the YFP intensity (green) and RFP  
836 intensity (magenta) was done; graphs are shown on the right, with two middle peaks (pointed by  
837 arrowheads) showing signals from the endoplasmic reticulum and two big peaks on both sides  
838 showing signals of the plasma membrane. Scale bars = 10  $\mu$ m.

839 **(C)** Representative confocal microscopy images of ERL1-YFP (left) in the abaxial epidermis of  
840 cotyledons of the 5-day-old *erecta erl1 erl2* seedlings stained with the endoplasmic reticulum dye  
841 Rodamine (second left column). The merged image is shown in the third left column.  
842 Quantification analysis of the YFP intensity (green) and RFP intensity (magenta) along the line  
843 drawn in the right image is shown as a graph on the right, with two middle peaks (pointed by  
844 arrowheads) showing signals from the endoplasmic reticulum and two big peaks on both sides  
845 showing signals of the plasma membrane. Scale bars = 10  $\mu$ m.

846 **(C)** Representative confocal microscopy images of ERL1-YFP (left) in the abaxial epidermis of  
847 cotyledons of the 5-day-old *erecta erl1 erl2* seedlings stained with the endoplasmic reticulum dye  
848 Rodamine (second left column). The merged image is shown in the third left column.  
849 Quantification analysis of the YFP intensity (green) and RFP intensity (magenta) along the line  
850 drawn in the right image is shown as a graph on the right, with two middle peaks (pointed by  
851 arrowheads) showing signals from the endoplasmic reticulum and two big peaks on both sides  
852 showing signals of the plasma membrane. Scale bars = 10  $\mu$ m.

853 (D) Immunoblot analysis of 3-day-old ERL1-FLAG *erecta erl1 erl2* seedlings treated with mock or  
854 5  $\mu$ M Stomagen for 2 days and then digested without or with Endo-H. Top panel shows the ERL1-  
855 FLAG detected by  $\alpha$ -FLAG. Lower panel shows the loading control of Tubulin detected by  $\alpha$ -  
856 Tubulin. Arrows indicate the ERL1 bands detected without or with Endo-H digestion.

857 (E) Representative confocal microscopy images of ERL1-YFP expressed in *erecta erl1 erl2*  
858 seedlings treated with mock (top left) or 50  $\mu$ M Tyr A23 (top right); mock (bottom left) or 100  $\mu$ M  
859 ES9-17 (bottom right). Arrow indicates the ring-like structure, characteristics of endoplasmic  
860 reticulum localization, detected after treatment with Tyr A23 or ES9-17. Scale bars = 10  $\mu$ m.

861

862 **Figure 7. Schematic model of ERL1 subcellular dynamics triggered by diverse EPF**  
863 **peptides with different biological activities.**

864 ERL1 (light green) is constitutively recycling and follows BFA-sensitive endosomal pathway  
865 (Receptor Recycling). EPF1 (orange) and EPFL6 (pink) peptide ligands both activate ERL1 to  
866 inhibit stomatal differentiation, trigger ERL1 trafficking via Wm-sensitive MVB, to vacuole (Signal  
867 Activation). EPF1-triggered ERL1 trafficking requires the presence of TMM (gray). In contrast,  
868 EPFL6 triggers ERL1 trafficking in TMM-independent manner. Stomagen (dark green), which  
869 blocks ERL1 signaling, causes stalling of ERL1 in endoplasmic reticulum (E.R.) (Signal Inhibition).  
870 The dominant-negative ERL1 $\Delta$ K is overwhelmingly plasma-membrane localized, with  
871 undetectable level of MVB-mediated internalization (Dominant Negative).

872

873



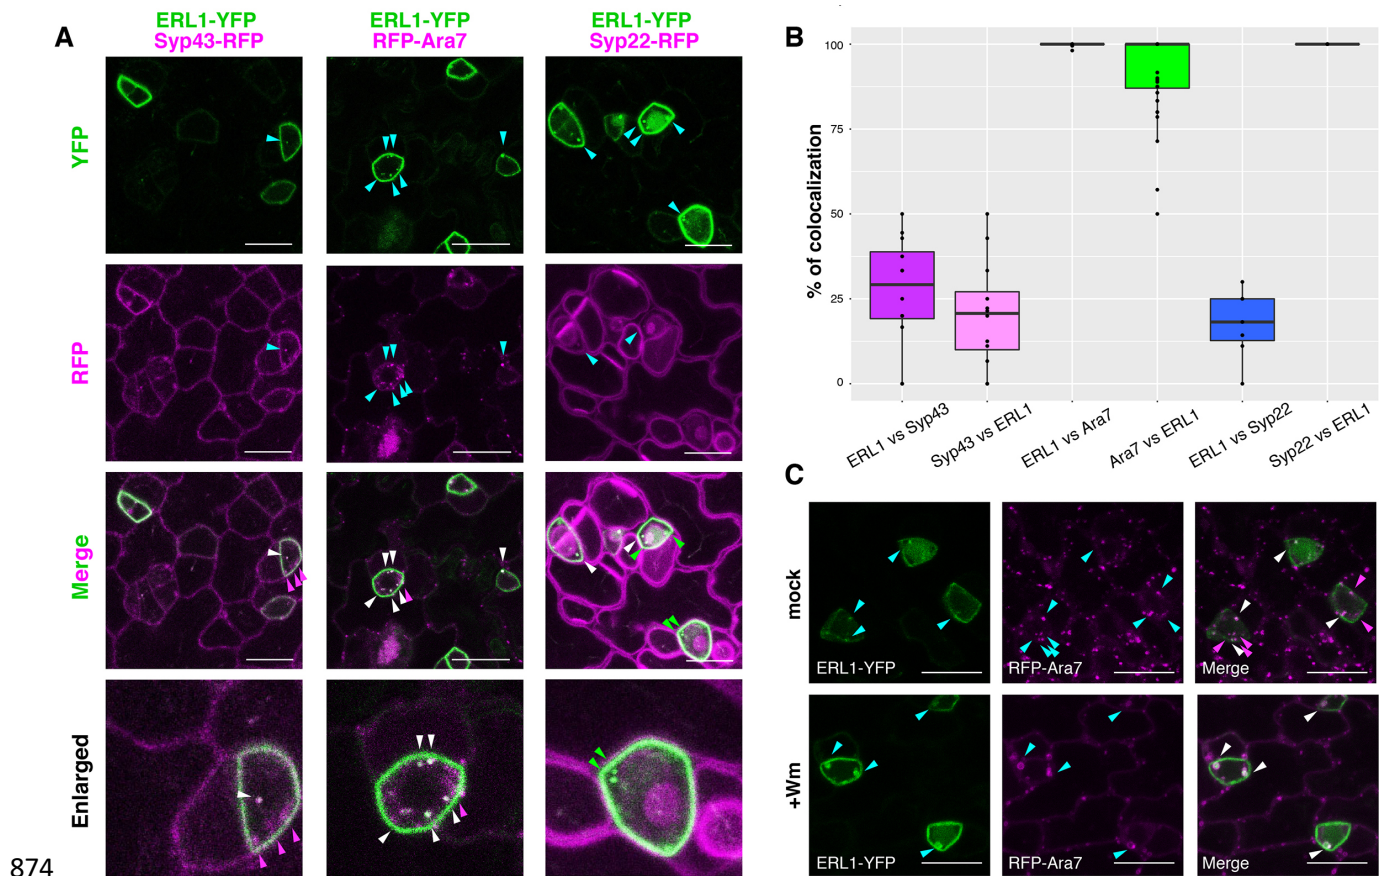

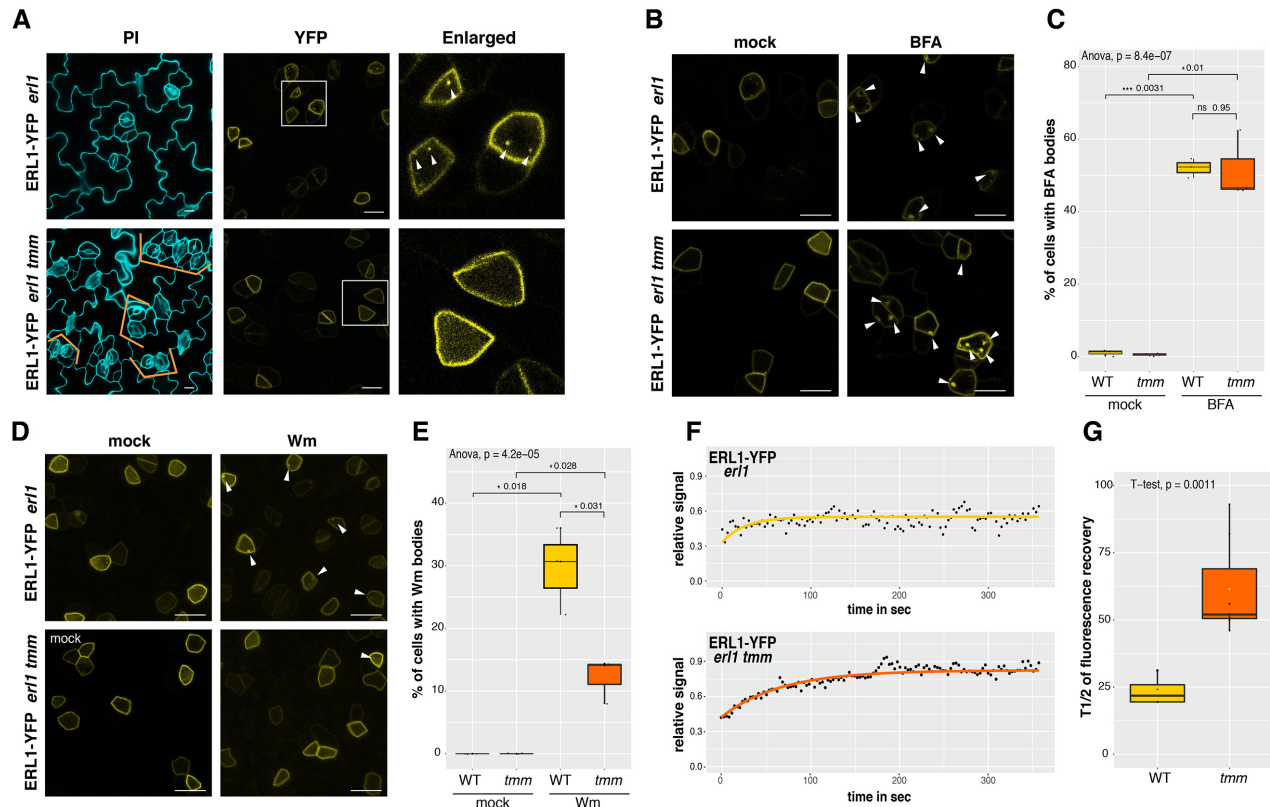

89.

895 **Figure 2. ERL1 internalization requires its co-receptor TMM**

896 (A) Representative confocal microscopy images of ERL1-YFP in *erl1* (top row) and in *erl1 tmm*  
897 (bottom row) in the abaxial epidermis of developing true leaves of the 7-day-old seedlings. Right  
898 column; enlarged images. Their stomatal phenotypes are shown on the left column. Orange  
899 brackets: clustered stomata. Arrowheads indicate endosomes. Scale bars = 10  $\mu$ m.

900 (B) Representative images of ERL1-YFP in *erl1* (top row) or in *erl1 tmm* (bottom row) of the  
901 abaxial epidermis of developing true leaves from the 7-day-old seedlings treated with mock (left  
902 column) or 30  $\mu$ M BFA (right column). Arrowheads indicate BFA bodies. Scale bars = 10  $\mu$ m.

903 (C) Quantitative analysis of the number of cells with BFA bodies when ERL1-YFP in *erl1* (yellow)  
904 or *erl1 tmm* (orange) are treated with mock or 30  $\mu$ M BFA. Lines in the boxplot show the median  
905 value. ANOVA was performed for comparing all samples, and Student's T-test was performed for  
906 pairwise comparisons. ns, not significant; \*  $p < 0.05$ . \*\*\*  $p < 0.0005$ ;  $n = 3$  independent experiments.  
907 For each experiment, the total numbers of cells counted are 86, 130, 66 (WT mock); 138, 94, 131  
908 (*tmm* mock); 230, 336, 109 (WT BFA); 300, 393, 211 (*tmm* BFA).

909 (D) Representative images of ERL1-YFP in *erl1* (top row) or in *erl1 tmm* (bottom row) treated with  
910 mock (left column) or 25  $\mu$ M Wm (right column). Arrowheads indicate Wm bodies. Scale bars = 10  
911  $\mu$ m.

912 (E) Quantitative analysis of the number of cells with Wm bodies when ERL1-YFP in *erl1* (yellow)  
913 or *erl1 tmm* (orange) are treated with mock or 25  $\mu$ M Wm. Lines in the boxplot show the median  
914 value. ANOVA was performed for comparing all samples, and Student's T-test was performed for  
915 pairwise comparisons between *erl1* and *erl1 tmm*. \*  $p < 0.05$ . \*\*\*  $p < 0.0005$ ;  $n = 3$  independent  
916 experiments. For each experiment, the total numbers of cells counted are 155, 73, 62 (WT mock);  
917 181, 126, 104 (*tmm* mock); 184, 136, 176 (WT Wm); 1043, 273, 83 (*tmm* BFA).

918 (F) FRAP analyses of plasma membrane ERL1-YFP in wild type (*erl1-2*) or in *tmm* (*erl1-2 tmm*).  
919 Shown are representative fluorescence recovery curves plotted as a function of time and fitted to  
920 Single Exponential Fitting. ERL1-YFP in *erl1* (top; yellow); ERL1-YFP in *erl1 tmm* (bottom;  
921 orange).

922 (g) Quantitative analysis of the half time of fluorescence recovery of plasma membrane ERL1-  
923 YFP in *erl1* (yellow) and *erl1 tmm* (orange). Lines in the boxplot show the median value. T-test  
924 was performed for pairwise comparisons between *erl1* and *erl1 tmm*. n=3 for WT and n=9 for *tmm*.  
925

926

927

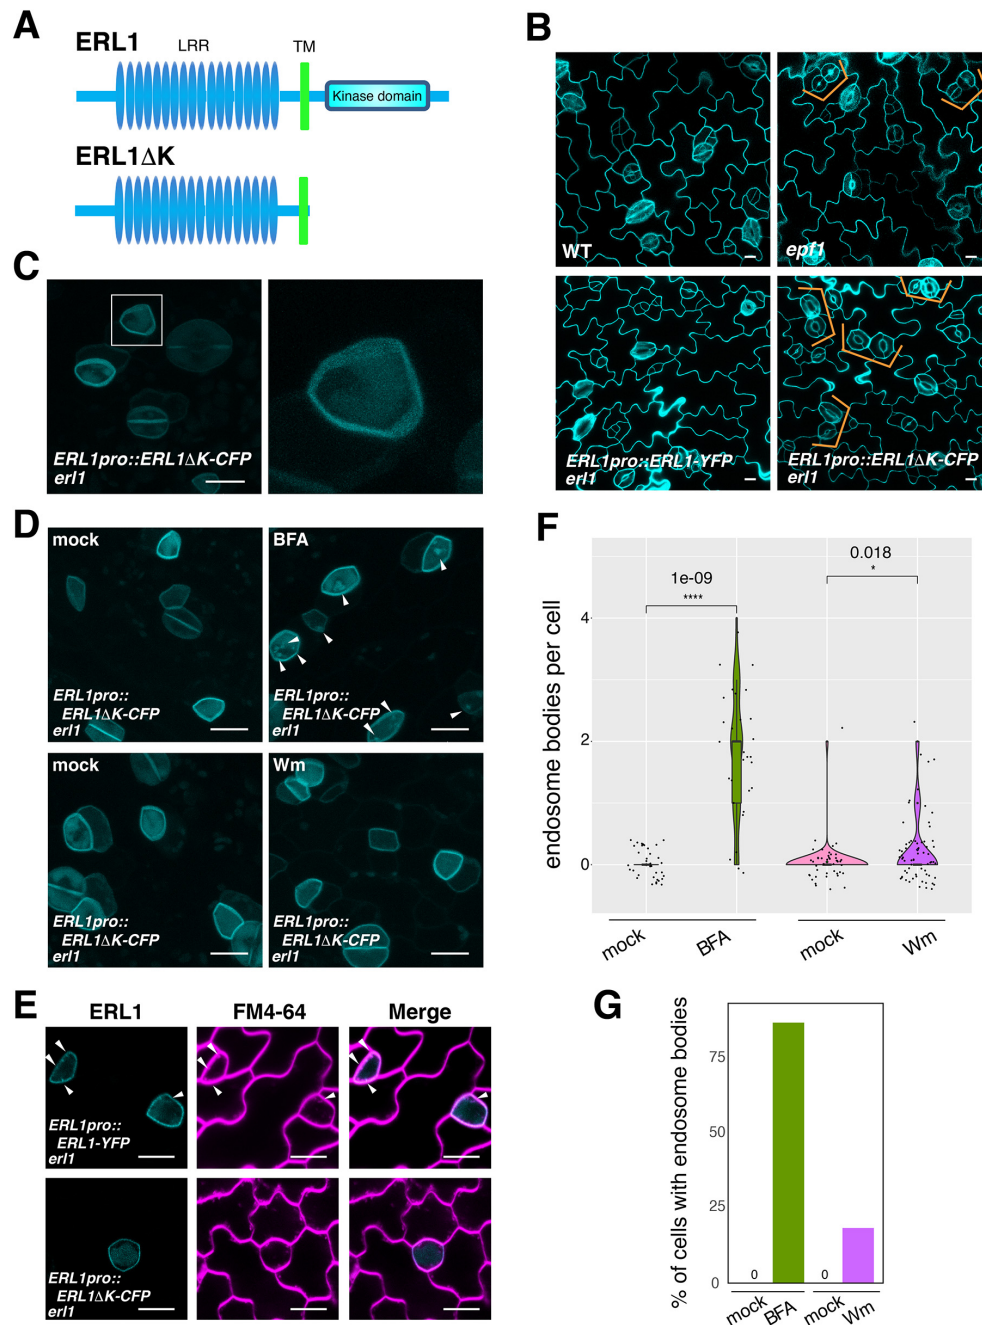

928

929 **Figure 3. ERL1 internalization requires its functionality**

930 (A) Diagram of the full-length ERL1 protein (top) and the dominant-negative ERL1 protein lacking  
931 the cytoplasmic domain (bottom).

932 (B) Representative confocal microscopy images of cotyledon abaxial epidermis from the 4-day-  
933 old seedlings of wild type (top left), *epf1* (top right), ERL1-YFP *erl1* (bottom left) and ERL1ΔK-  
934 CFP *erl1* (bottom right), stained by PI. Brackets indicate the paired stomata in *epf1* and ERL1ΔK-  
935 CFP in *erl1*. Scale bars = 10 μm.

936 (C) Representative confocal microscopy images of ERL1ΔK-CFP in *erl1* of the abaxial developing  
937 true leaf epidermis from the 7-day-old seedlings. Right, the enlarged image from the highlighted  
938 area (left, white rectangle). Scale bars = 10 μm.

939 **(D)** Representative confocal microscopy images of ERL1ΔK-CFP treated with mock (top left for  
940 BFA treatment), 30 μM BFA (top right), mock (bottom left for Wm treatment) and 25 μM Wm  
941 (bottom right). Arrowheads indicate BFA bodies. Scale bars = 10 μm.

942 **(E)** Representative images of ERL1-YFP in *erl1* (upper row) and ERL1ΔK-CFP in *erl1* (bottom  
943 row) stained with an endocytosis monitoring membrane dye, FM4-64, in the abaxial epidermis of  
944 developing true leaves of the 7-day-old seedlings. Arrowheads indicate internalized endosomes.

945 **(F)** Quantitative analysis of the number of ERL1-YFP-positive BFA- or Wm bodies per cell shown  
946 as a violin plot. Individual data points are dot-plotted with jitter. Median values are shown as lines  
947 in the boxplot. ANOVA was performed for comparing all samples, and T-test was performed for  
948 the pairwise comparison of mock and drug-treated samples. p values were indicated between  
949 every two compared samples. n = 36 for mock (BFA); n = 29 for BFA; n = 44 for mock (Wm); n =  
950 66 for Wm.

951 **(G)** Quantitative analysis of the percentage of cells with BFA bodies (green) or Wm bodies (purple)  
952 when ERL1ΔK-CFP are treated with mock, 30 μM BFA or mock, 25 μM Wm.  
953

954

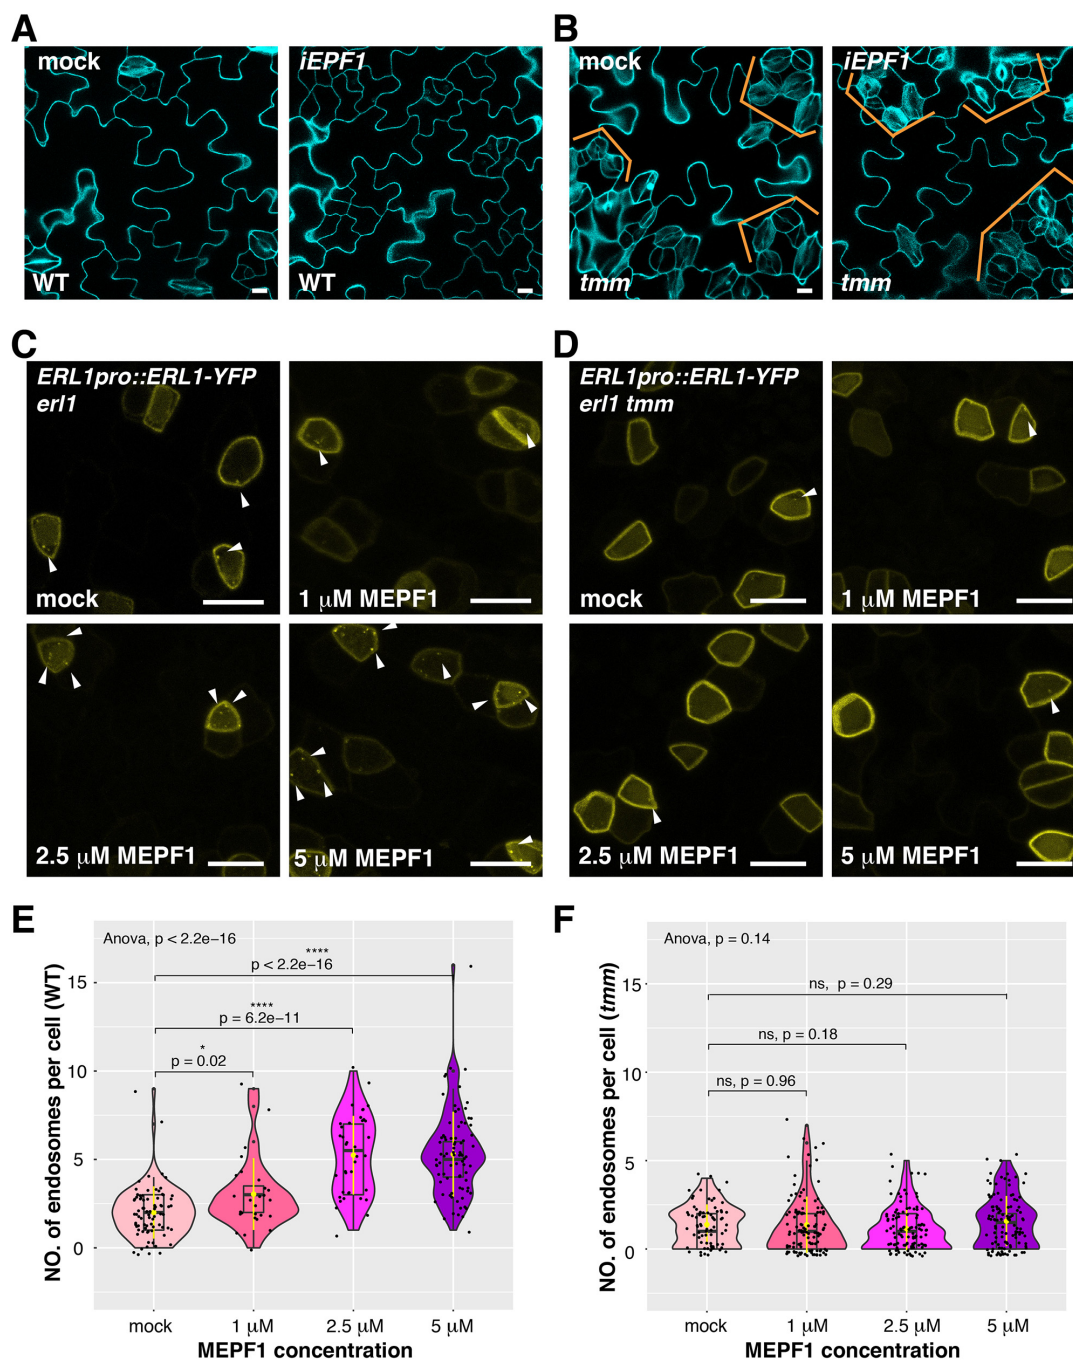

955

956 **Figure 4. MEPF1 triggers ERL1-YFP internalization in *erl1* but not in *erl1 tmm***  
 957 (A) Representative confocal microscopy images of cotyledon abaxial epidermis from the 4-day-  
 958 old *iEPF1* seedlings treated with mock (left) or 10  $\mu$ M Estradiol (right). Scale bars = 10  $\mu$ m.  
 959 (B) Representative confocal microscopy images of cotyledon abaxial epidermis from the 4-day-  
 960 old *iEPF1* in *tmm* seedlings treated with mock/DMSO (left) or 10  $\mu$ M Estradiol (right). Brackets  
 961 indicate clustered stomata in both mock and estradiol-induced samples. Scale bars = 10  $\mu$ m.  
 962 (C) Representative confocal microscopy images of ERL1-YFP in *erl1* treated with mock (top left),  
 963 1  $\mu$ M MEPF1 (top right), 2.5  $\mu$ M MEPF1 (bottom left) and 5  $\mu$ M MEPF1 (bottom right) are shown.  
 964 Arrowheads indicate endosomes. Scale bars = 10  $\mu$ m.

965 **(D)** Representative confocal microscopy images of ERL1-YFP in *erl1 tmm* treated with mock (top  
966 left), 1  $\mu$ M MEPF1 (top right), 2.5  $\mu$ M MEPF1 (bottom left) and 5  $\mu$ M MEPF1 (bottom right) are  
967 shown. Arrowheads indicate endosomes. Scale bars = 10  $\mu$ m.

968 **(E)** Quantitative analysis of the number of ERL1-YFP-positive endosomes per cell at different  
969 concentrations of MEPF1 application in *erl1* shown as a violin plot. Dots, individual data points.  
970 Median values are shown as lines in the boxplot, and mean values are shown as yellow dots in  
971 the plot. ANOVA was performed for comparing all samples, and T-test was performed for pairwise  
972 comparisons of samples treated with the mock and different concentration of MEPF1. n= 79, 27,  
973 38, 82 for treatment with mock, 1  $\mu$ M, 2.5  $\mu$ M, 5 $\mu$ M MEPF1.

974 **(F)** Quantitative analysis of the number of ERL1-YFP-positive endosomes per cell at different  
975 concentrations of MEPF1 application in *erl1 tmm* shown as a violin plot. Dots, individual data  
976 points. Median values are shown as lines in the boxplot, and mean values are shown as yellow  
977 dots in the plot. ANOVA was performed for comparing all samples, and T-test was performed for  
978 pairwise comparisons of samples treated with the mock and different concentration of MEPF1.  
979 n= 76, 113, 109, 114 for treatment with mock, 1  $\mu$ M, 2.5  $\mu$ M, and 5 $\mu$ M MEPF1, respectively.  
980

981

982

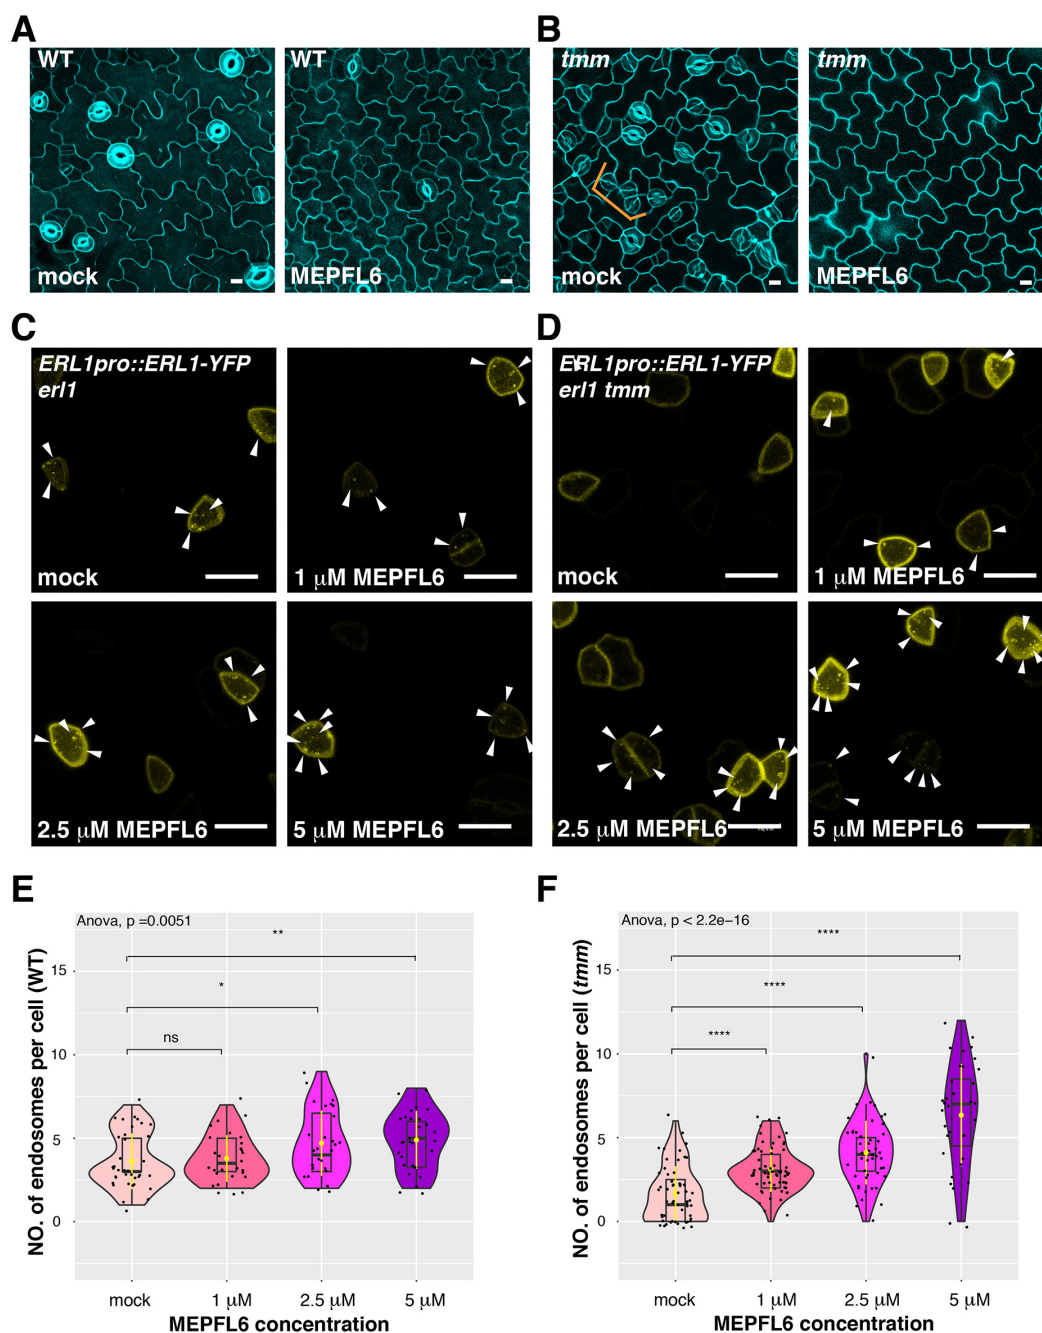

983

984 **Figure 5. MEPFL6 triggers ERL1-YFP internalization in both *erl1* and *erl1 tmm***  
985 (A) Representative confocal microscopy images of cotyledon abaxial epidermis from the 5-day-  
986 old wild type seedlings treated with mock (left) or 5  $\mu$ M MEPFL6 (right). Scale bars = 10  $\mu$ m.  
987 (B) Shown are representative confocal microscopy images of cotyledon abaxial epidermis from  
988 the 5-day-old *tmm* seedlings treated with mock (left) or 5  $\mu$ M MEPFL6 (right). Scale bar =10  $\mu$ m.  
989 (C) Representative images of ERL1-YFP in *erl1* treated with mock (top left), 1  $\mu$ M MEPFL6 (top  
990 right), 2.5  $\mu$ M MEPFL6 (bottom left) and 5  $\mu$ M MEPFL6 (bottom right) are shown. Arrowheads  
991 indicate endosomes. Scale bar = 10  $\mu$ m.



992 **(D)** Representative images of ERL1-YFP in *erl1 tmm* treated with mock (top left), 1  $\mu$ M MEPFL6  
993 (top right), 2.5  $\mu$ M MEPFL6 (bottom left) and 5  $\mu$ M MEPFL6 (bottom right) are shown. Arrowheads  
994 indicate endosomes. Scale bars = 10  $\mu$ m.

995 **(E)** Quantitative analysis of the number of ERL1-YFP-positive endosomes per cell at different  
996 concentrations of MEPFL6 application in *erl1* shown as a Violin plot. Median values are shown  
997 as lines in the boxplot, and mean values are shown as yellow dots in the plot. Dots, individual  
998 data points. ANOVA was performed for comparing all samples, and T-test was performed for a  
999 pairwise comparisons of samples treated with the mock and different concentration of MEPFL6.  
1000 p values were indicated for every pairwise comparison. n= 37, 28, 27, 30 for treatment with mock,  
1001 1  $\mu$ M, 2.5  $\mu$ M, 5  $\mu$ M MEPFL6.

1002 **(F)** Quantitative analysis of the number of ERL1-YFP-positive endosomes per cell at different  
1003 concentrations of MEPFL6 application in *erl1 tmm* shown as a Violin plot. Dots, individual data  
1004 points. Median values are shown as lines in the boxplot, and mean values are shown as yellow  
1005 dots in the plot. ANOVA was performed for comparing all samples, and T-test was performed for  
1006 a pairwise comparisons of samples treated with the mock and different concentration of MEPFL6.  
1007 p values were indicated between every two compared samples. n= 55, 63, 48, 35 for treatment  
1008 with mock, 1  $\mu$ M, 2.5  $\mu$ M, 5  $\mu$ M MEPFL6.

1009  
1010

1011

1012

1013

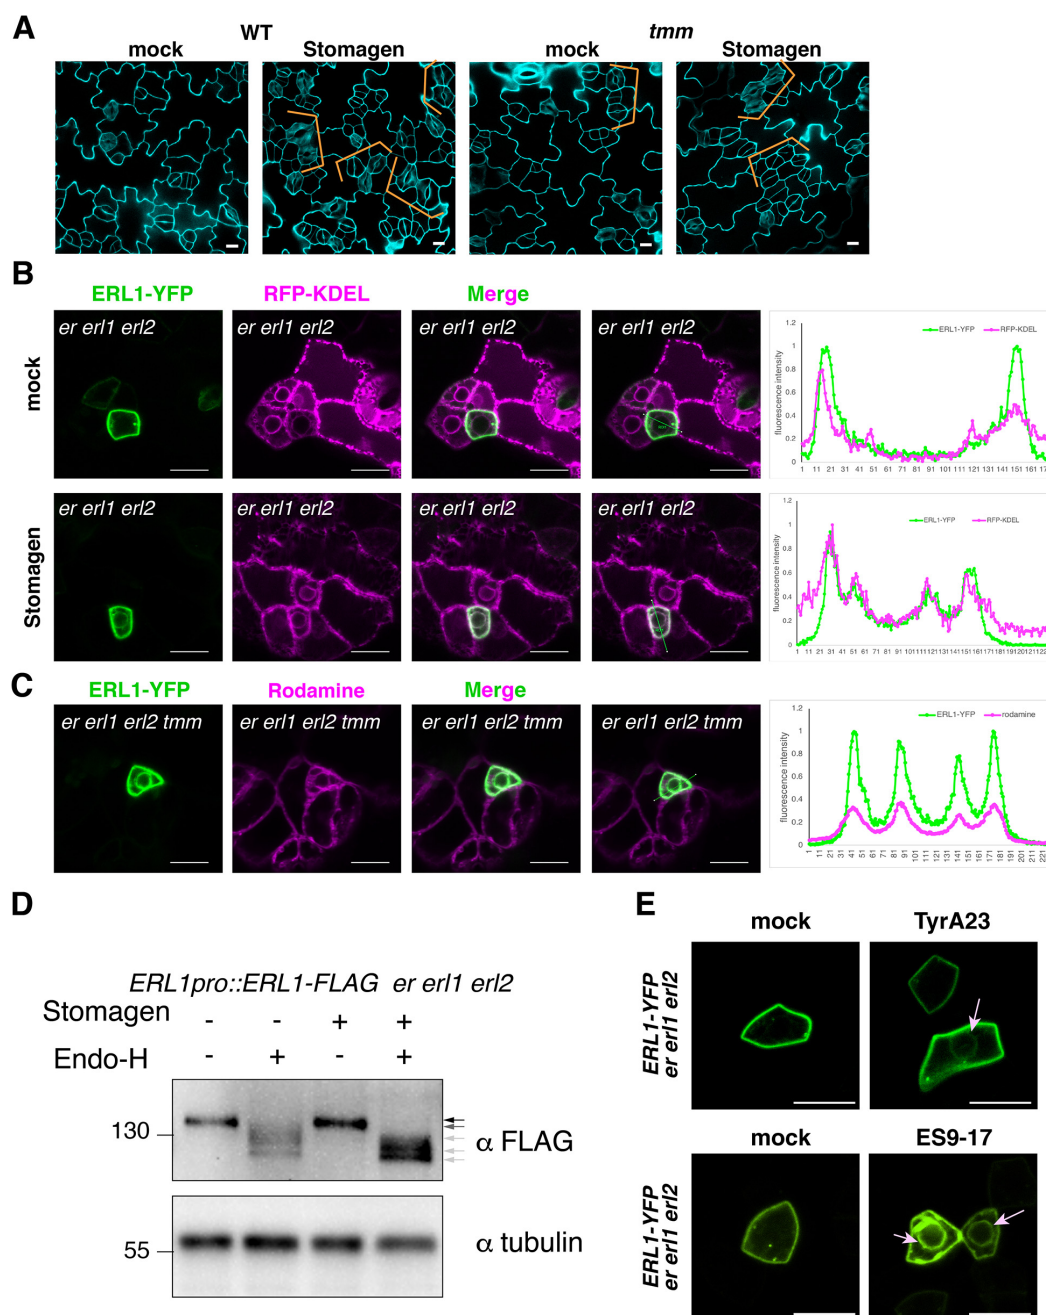

1014

**1015 Figure 6. Stomagen application confers accumulation of ERL1 in endoplasmic reticulum**

1016 (A) Representative confocal microscopy images of cotyledon abaxial epidermis from the 5-day-  
 1017 old wild type seedlings (left two) or *tmm* seedlings (right two) treated with mock (first and third  
 1018 from the left) or 5  $\mu$ M Stomagen (second and fourth from the left). Scale bars = 10  $\mu$ m.

1019 (B) Representative confocal microscopy images of ERL1-YFP (left column) and co-localization  
 1020 analysis with the endoplasmic reticulum marker RFP-KDEL (second left column) in the abaxial  
 1021 epidermis of cotyledons of the 5-day-old *erecta* (*er er1 erl2*) seedlings treated with mock (top row)  
 1022 or 5  $\mu$ M Stomagen (bottom row). Merged images are shown in the third left column. Fourth column  
 1023 shows the line slicing along which quantification analysis of the YFP intensity (green) and RFP

1024 intensity (magenta) was done; graphs are shown on the right, with two middle peaks showing  
1025 signals from the endoplasmic reticulum and two big peaks on both sides showing signals of the  
1026 plasma membrane. Scale bars = 10  $\mu\text{m}$ .

1027 **(C)** Representative confocal microscopy images of ERL1-YFP (left) in the abaxial epidermis of  
1028 cotyledons of the 5-day-old *erecta erl1 erl2* seedlings stained with the endoplasmic reticulum dye  
1029 Rodamine (second left column). The merged image is shown in the third left column.  
1030 Quantification analysis of the YFP intensity (green) and RFP intensity (magenta) along the line  
1031 drawn in the right image is shown as a graph on the right, with two middle peaks showing signals  
1032 from the endoplasmic reticulum and two big peaks on both sides showing signals of the plasma  
1033 membrane. Scale bars = 10  $\mu\text{m}$ .

1034 **(D)** Immunoblot analysis of 3-day-old ERL1-FLAG *erecta erl1 erl2* seedlings treated with mock or  
1035 5  $\mu\text{M}$  Stomagen for 2 days and then digested without or with Endo-H. Top panel shows the ERL1-  
1036 FLAG detected by  $\alpha$ -FLAG. Lower panel shows the loading control of Tubulin detected by  $\alpha$ -  
1037 Tubulin. Arrows indicate the ERL1 bands detected without or with Endo-H digestion.

1038 **(E)** Representative confocal microscopy images of ERL1-YFP expressed in *erecta erl1 erl2*  
1039 seedlings treated with mock (top left) or 50  $\mu\text{M}$  Tyr A23 (top right); mock (bottom left) or 100  $\mu\text{M}$   
1040 ES9-17 (bottom right). Arrow indicates the ring-like structure, characteristics of endoplasmic  
1041 reticulum localization, detected after treatment with Tyr A23 or ES9-17. Scale bars = 10  $\mu\text{m}$ .

1042

1043

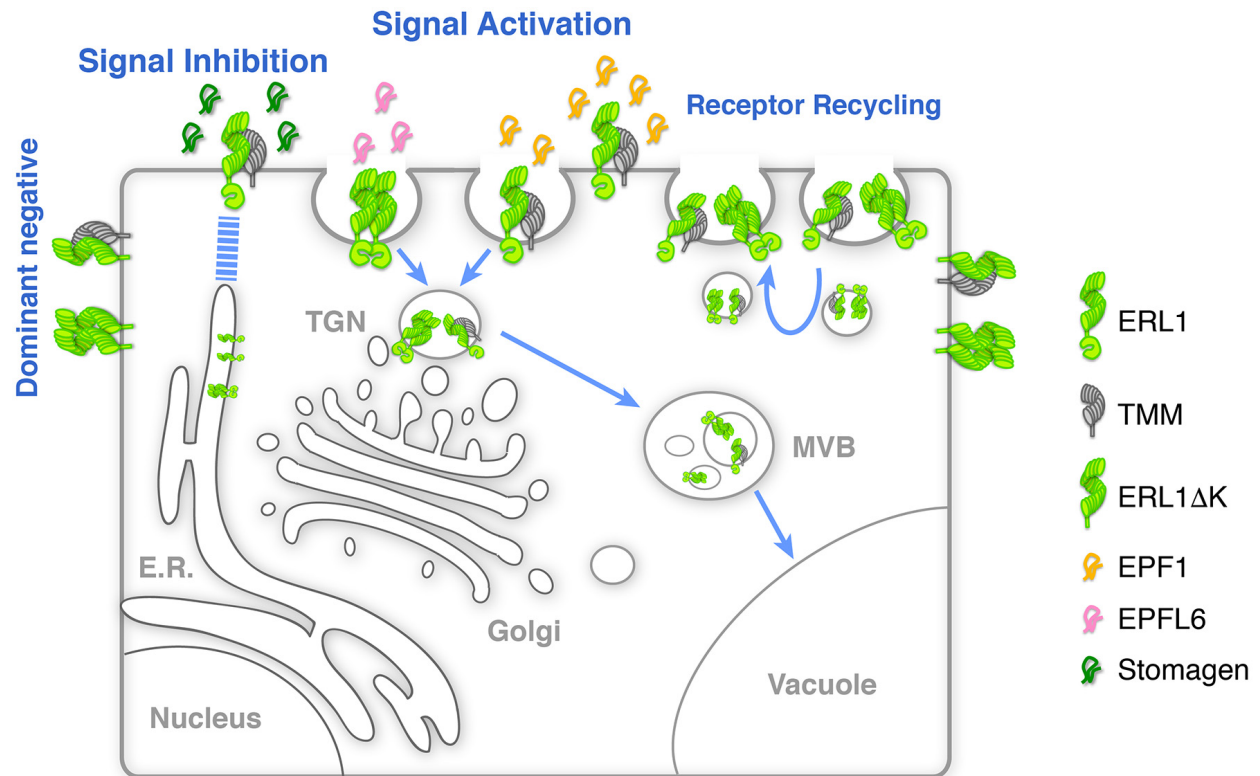

1044

1045 **Figure 7. Schematic model of ERL1 subcellular dynamics triggered by diverse EPF**  
1046 **peptides with different biological activities.**

1047 ERL1 (light green) is constitutively recycling and follows BFA-sensitive endosomal pathway  
1048 (Receptor Recycling). EPF1 (orange) and EPFL6 (pink) peptide ligands both activate ERL1 to  
1049 inhibit stomatal differentiation, trigger ERL1 trafficking via Wm-sensitive MVB, to vacuole (Signal  
1050 Activation). EPF1-triggered ERL1 trafficking requires the presence of TMM (gray). In contrast,  
1051 EPFL6 triggers ERL1 trafficking in TMM-independent manner. Stomagen (dark green), which  
1052 blocks ERL1 signaling, causes stalling of ERL1 in endoplasmic reticulum (E.R.) (Signal Inhibition).  
1053 The dominant-negative ERL1ΔK is overwhelmingly plasma-membrane localized, with  
1054 undetectable level of MVB-mediated internalization (Dominant Negative).  
1055

1056

1057

1058

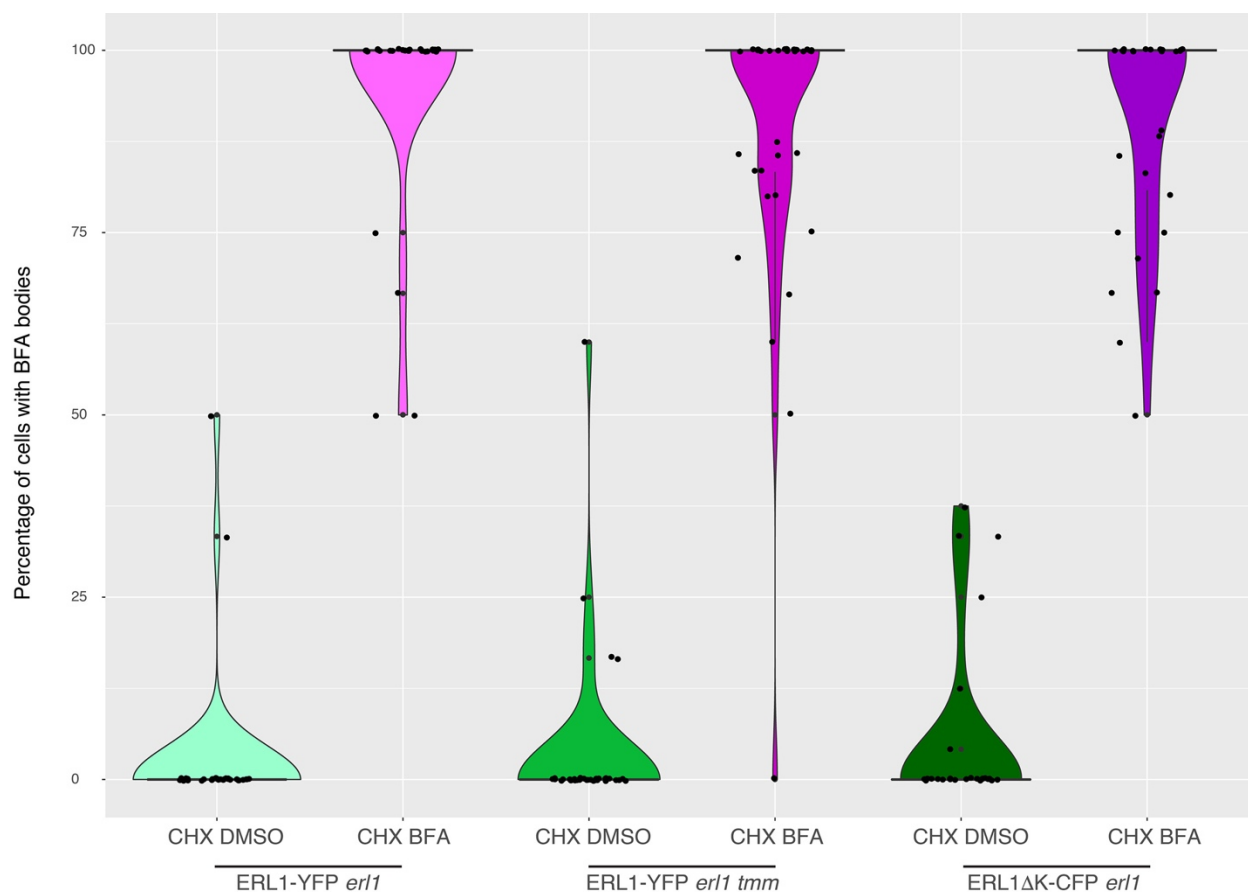

1059

1060

1061 **Figure S1: ERL1 BFA body formation in wild-type, *tmm*, or dominant-negative ERL1**  
1062 **background in the presence of cycloheximide**

1063 True leaves of 7-day-old Arabidopsis seedlings expressing either ERL1-YFP or ERL1ΔK-CFP  
1064 were pretreated with 50 μM CHX for 1 hr, followed by treatment with either ethanol or 50 μM BFA  
1065 for 30 min. Violin plot with boxplot is used to show the quantification of the number of cells with  
1066 BFA bodies. Individual data points are dot-plotted with jitter. Median values are shown as lines in  
1067 the boxplot. n= 33 for ERL1-YFP CHX DMSO, n= 29 for ERL1-YFP CHX BFA, n= 34 for ERL1-  
1068 YFP *tmm* CHX DMSO, n= 34 for ERL1-YFP *tmm* CHX BFA, n= 29 for ERL1ΔK-CFP CHX DMSO,  
1069 n= 30 for ERL1ΔK-CFP CHX BFA.

1070

1071

1072

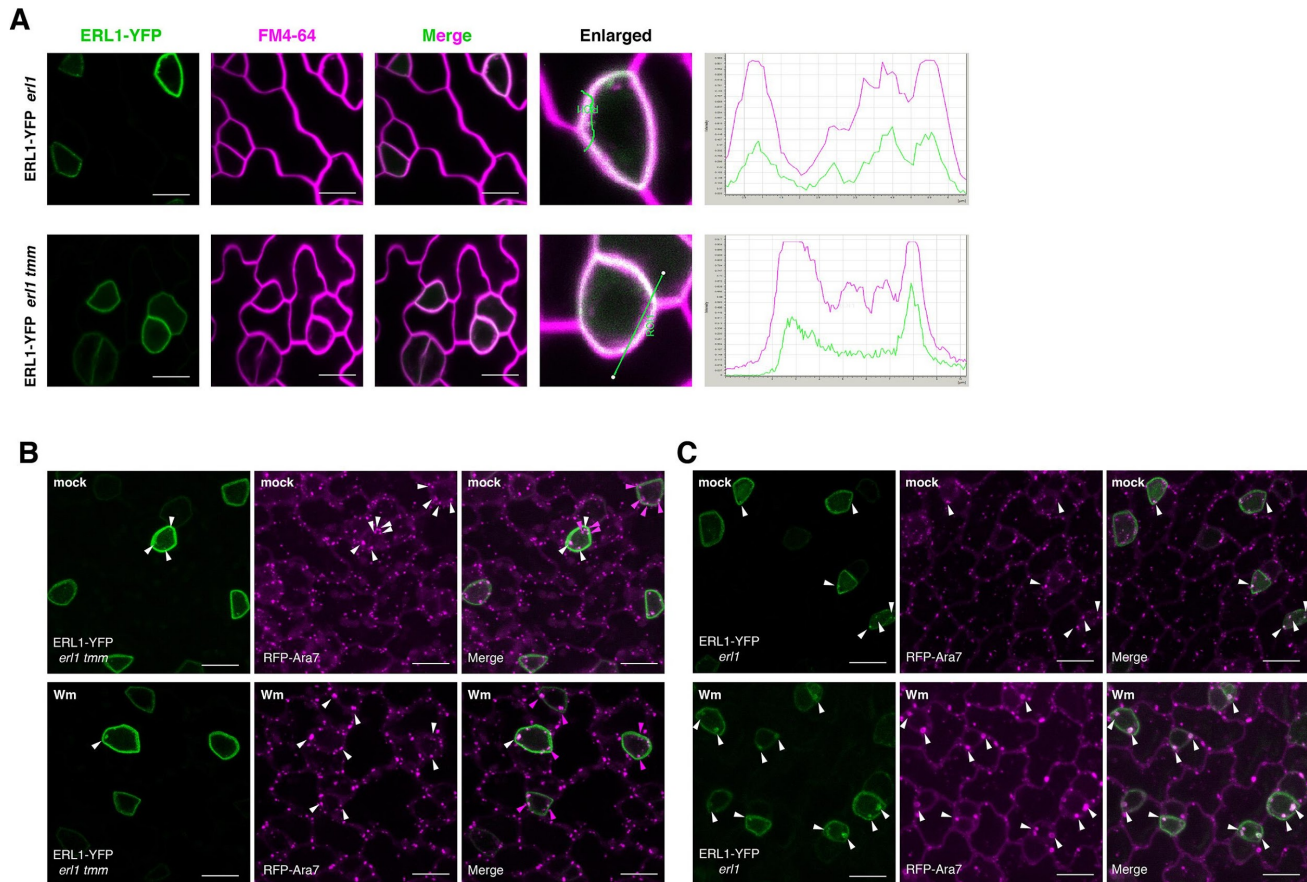

1073

1074 **Figure S2: *tmm* mutation does not affect general internalization and the MVB structure**

1075 (A) Representative confocal microscopy images of ERL1-YFP (green) and FM4-64 staining  
1076 (magenta) of developing true leaf abaxial epidermis from 7-day-old seedlings expressing  
1077 *ERL1pro::ERL1-YFP* in *erl1* (top row) and *erl1 tmm* (bottom row). Merged images of ERL1-YFP  
1078 and FM4-64 staining are shown in the third column from left, and enlarged cells are shown in  
1079 the last column. Right, fluorescence intensity quantified along the line from different channels  
1080 showing their co-localization. Scale bars = 10  $\mu$ m.

1081 (B) Representative confocal microscopy images of ERL1-YFP (green) and RFP-Ara7 (magenta)  
1082 of developing true leaf abaxial epidermis from 7-day-old seedlings expressing *ERL1pro::ERL1-*  
1083 *YFP* in *erl1 tmm* treated with mock (top row) or with 25  $\mu$ M Wm (bottom row). Arrowheads  
1084 indicate endosomes or Wm bodies. Scale bars = 10  $\mu$ m.

1085 (C) Shown are representative images of ERL1-YFP (first column) and RFP-Ara7 (second  
1086 column) in using developing true leaf abaxial epidermis of the 7-day-old seedlings of *erl1*  
1087 treated with mock/DMSO (top row) or with 25  $\mu$ M Wm (bottom row). Arrowheads indicate endosomes or  
1088 Wm bodies. Scale bar = 10  $\mu$ m.

1089

1090

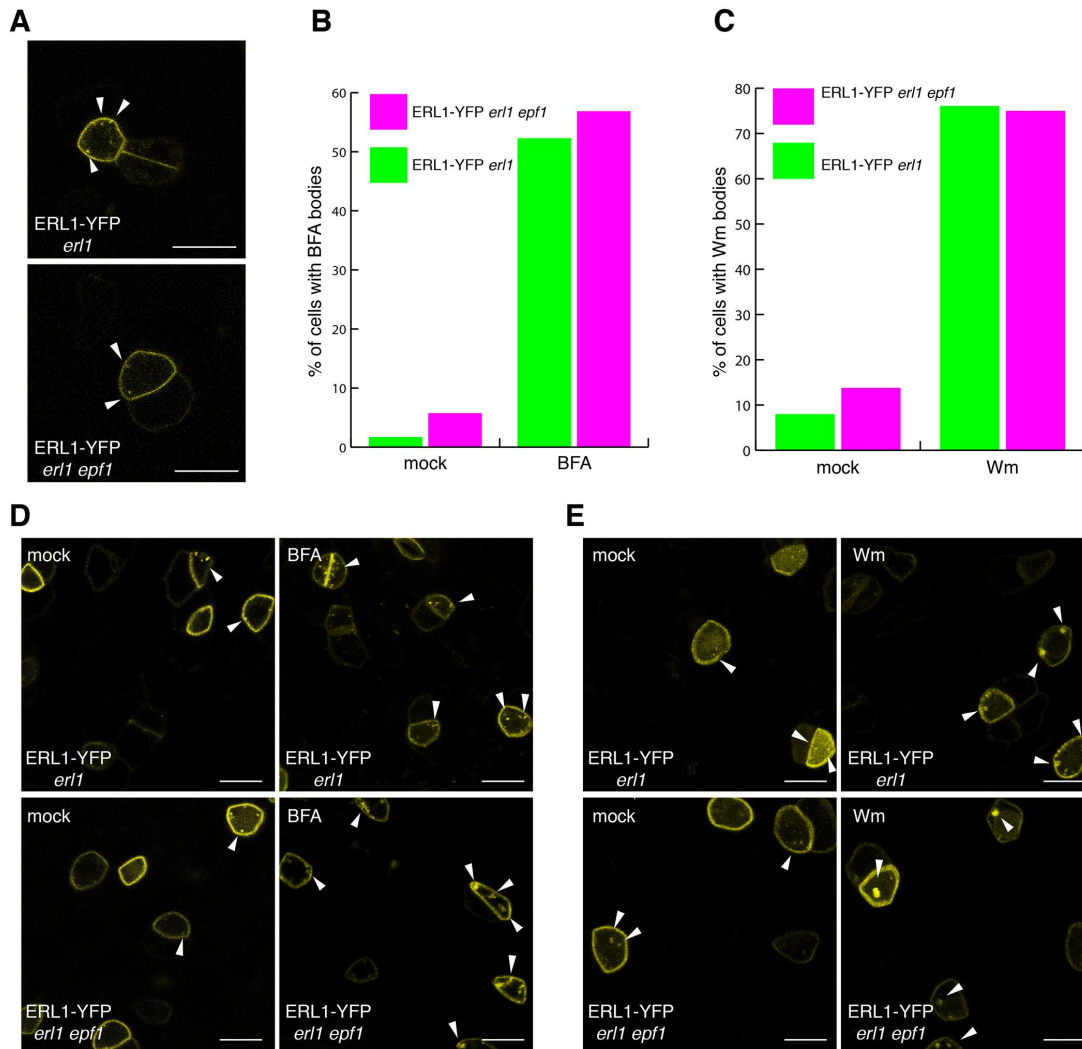

1091

1092 **Figure S3: Absence of endogenous EPF1 does not affect ERL1-YFP internalization**

1093 **(A)** Representative confocal microscopy images of an abaxial true leaf epidermis from 7-day-old  
1094 seedling expressing *ERL1pro::ERL1-YFP* in *erl1* (top) and in *erl1 epf1* (bottom); Arrowheads  
1095 indicate endosomes. Scale bars =10  $\mu$ m.

1096 **(B)** Quantitative analysis of the percentage of cells with BFA bodies when ERL1-YFP in *erl1*  
1097 (green) or *erl1 epf1* (purple) are treated with mock or 30  $\mu$ M BFA. n = 117, 139, 67, 51 for mock  
1098 (*erl1*), mock (*erl1 epf1*), BFA (*erl1*), BFA (*erl1 epf1*).

1099 **(C)** Quantitative analysis of the percentage of cells with Wm bodies when ERL1-YFP in *erl1*  
1100 (green) or *erl1 epf1* (purple) are treated with mock or 25  $\mu$ M Wm. n = 50, 39, 46, 60 for mock  
1101 (*erl1*), mock (*erl1 epf1*), Wm (*erl1*), Wm (*erl1 epf1*).

1102 **(D)** Representative confocal microscopy images of ERL1-YFP in *erl1* (top row) or in *erl1 epf1*  
1103 (bottom row) treated with mock (left column) or 30  $\mu$ M BFA (right column). Arrowheads indicate  
1104 endosomes or BFA bodies. Scale bars =10  $\mu$ m.

1105 **(E)** Representative confocal microscopy images of ERL1-YFP in *erl1* (top row) or in *erl1 epf1*  
1106 (bottom row) treated with mock (left column) or 25  $\mu$ M Wm (right column). Arrowheads indicate  
1107 endosomes or Wm bodies. Scale bars =10  $\mu$ m.

1108

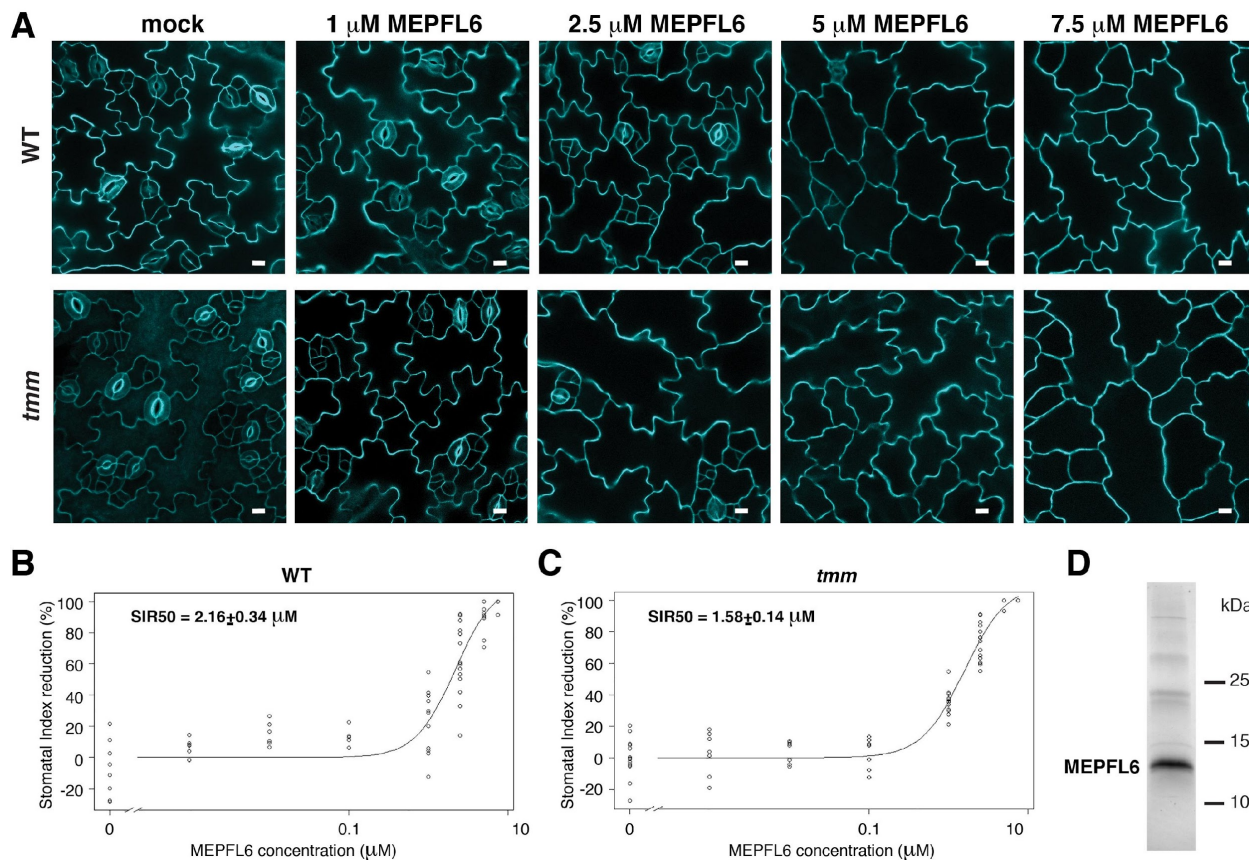

1109

1110 **Figure S4: Stomatal development in *tmm* is more sensitive than in wild type to MEPFL6**  
1111 **application**

1112 (A) Effects of recombinant MEPFL6. Shown are representative confocal images of abaxial  
1113 epidermis from 5-day-old wild-type (top row) and *tmm* mutant (bottom row) seedlings with mock  
1114 (left) and increasing concentrations of MEPFL6 (corresponding concentrations are indicated on  
1115 top of each column). Scale bars = 10  $\mu$ m.

1116 (B) Dose response curve of abaxial epidermis stomatal index reduction in 5-day-old wild-type  
1117 seedlings to different concentrations of MEPFL6. SIR50 indicates the MEPFL6 concentration  
1118 that causes 50% of Stomatal Index Reduction.

1119 (C) Dose response curve of abaxial epidermis stomatal index reduction in 5-day-old *tmm* mutant  
1120 seedlings to different concentrations of MEPFL6. SIR50 indicates the MEPFL6 concentration  
1121 that causes 50% of Stomatal Index Reduction.

1122 (D) SDS-PAGE analysis of predicted MEPFL6-6xHis recombinant protein expressed and  
1123 purified from *E.coli*.

1124



1125

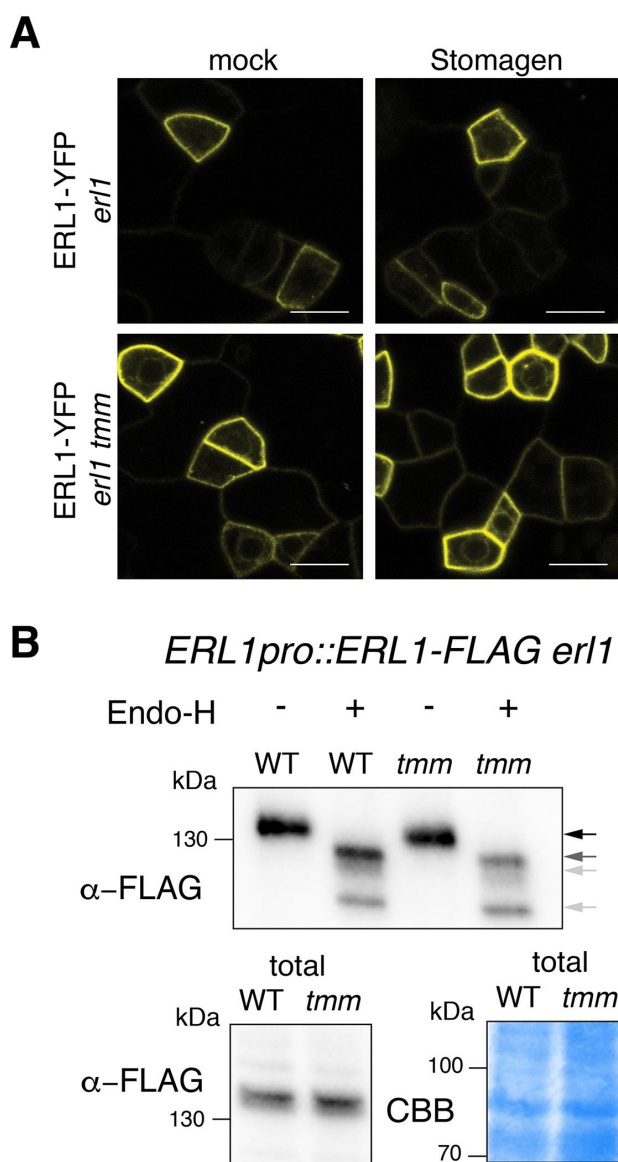

1126

1127 **Figure S5: Inefficient endocytosis causes ERL1-YFP to stall in the endoplasmic reticulum**

1128 (A) Representative confocal microscopy images of ERL1-YFP in the abaxial epidermis of true  
1129 leaves of the 7-day-old *erl1* seedlings (top row) or *erl1 tmm* seedlings (bottom row) treated with  
1130 mock (left column) or 5  $\mu$ M Stomagen (right column). Scale bars = 10  $\mu$ m.

1131 (B) Immunoblot analysis of 7-day-old *ERL1pro::ERL1-FLAG erl1* seedlings and  
1132 *ERL1pro::ERL1-FLAG erl1 tmm* seedlings digested without or with Endo-H. Top panel shows  
1133 the immunoprecipitated ERL1-FLAG without or with Endo-H digestion detected by  $\alpha$ -FLAG.  
1134 Bottom panels show the ERL1-FLAG from the total protein immune-detected by  $\alpha$ -FLAG (left)  
1135 and those detected by Commassie Brilliant Blue (CBB) staining as a loading control (right).  
1136 Arrows indicate the ERL1 bands detected without (black arrow) or with (gray arrows) Endo-H  
1137 digestion.

1138

1139

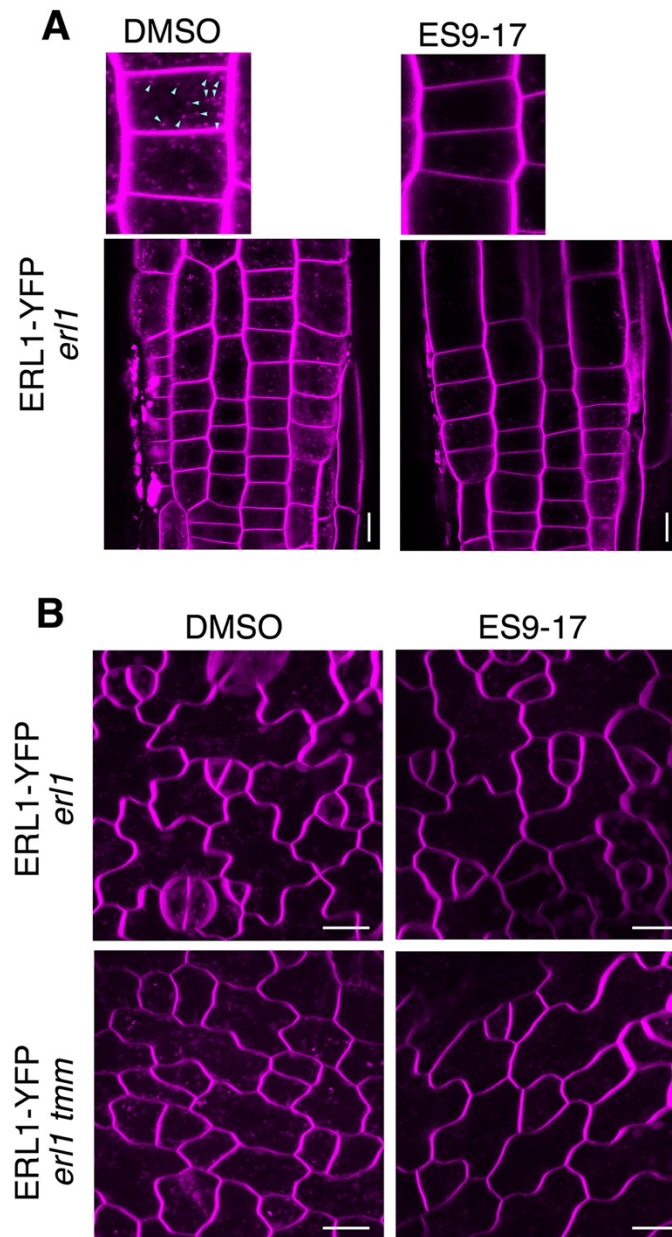

1140

1141 **Figure S6: ES9-17 inhibits endocytosis of leaf epidermal cells**

1142 (A) Primary roots of 3-day-old *erl1-2* seedlings expressing ERL1-YFP treated with DMSO (left) or  
1143 ES9-17 (right) followed by FM4-64 staining. Top panels, magnified images. Only red channel was  
1144 used to image FM4-64. The ES7-19 treatment diminishes endocytosis (arrowheads in DMSO).  
1145 Scale bar = 10  $\mu$ m.

1146 (B) True leaves of 7-day-old *erl1* (top) or *erl1 tmm* (bottom) seedlings expressing ERL1-YFP  
1147 treated with DMSO (left) or ES 9-17 (right) followed by FM4-64 staining. Only red channel was  
1148 used to image FM4-64. The ES7-19 treatment diminishes endocytosis. Scale bars = 10  $\mu$ m.

1149

1150
